# Supplementary material for: A bio-inspired design and computational prediction of scorpion-like SCS nickel pincer complexes for lactate racemization
Source: Royal Society of Chemistry journal article supplement (doi:10.1039/c7cc06416k), 2017-01-01
Supplement: c7cc06416k1.pdf [file c7cc06416k1.pdf]

## *Electronic Supplementary Information*

### **Bio-inspired design and computational prediction of scorpion-like SCS nickel pincer complexes for lactate racemization**

Bing Qiu<sup>a,b</sup>, Xinzheng Yang<sup>\*,a,b</sup>

<sup>a</sup> *Beijing National Laboratory for Molecular Sciences, State Key Laboratory for Structural Chemistry of Unstable and Stable Species, CAS Research/Education Center for Excellence in Molecular Sciences, Institute of Chemistry, Chinese Academy of Sciences, Beijing 100190, People's Republic of China. E-mail: [xyang@iccas.ac.cn](mailto:xyang@iccas.ac.cn)*

<sup>b</sup> *University of Chinese Academy of Sciences, Beijing 100049, People's Republic of China.*

#### **1. Computational details**

All DFT calculations in this study were performed using the Gaussian 09 suite of ab initio programs<sup>1</sup> for the  $\omega$ B97X-D<sup>2</sup> functional with all-electron 6-31+G(d,p) basis set for H, C, N, O, S, P, Cl, Br,<sup>3</sup> and the Stuttgart relativistic effective core potential basis set for Ni (ECP10MDF) and Pd (ECP28MWB).<sup>4</sup> All structures in this paper were optimized in water by using the integral equation formalism polarizable continuum model (IEFPCM)<sup>5</sup> with the SMD<sup>6</sup> atomic radii for solvent corrections. The ground states were confirmed as singlet through comparison with optimized high-spin analogs. An ultrafine integration grid (99,590) was used for numerical integrations. Thermal corrections were calculated within the harmonic potential approximation on optimized structures under T = 298.15 K and 1 atm pressure. Unless otherwise noted, the relative energies reported in the text are Gibbs free energies with the solvent effect corrections. The calculated structures were verified to have no imaginary frequency (IF) for all intermediates and only one IF for each transition state. All transition states were also confirmed to connect reactants and products by intrinsic reaction coordinate (IRC) calculations. The JIMP2 molecular visualizing and manipulating program was employed to draw the 3D molecular structures.<sup>7</sup>

## 2. Evaluation of density functionals

In order to examine the reliability of density functionals for this Ni system, we also calculated the relative free energies between **A + L-lactate** and **TS<sub>1A,2A</sub>** using other six well recognized functionals with different Hartree-Fock exchanges and disperse corrections, including TPSS<sup>8</sup>, B3LYP<sup>9-10</sup>, B3LYP-D3(BJ)<sup>11</sup>, M06<sup>12</sup>, M06-2X<sup>12</sup> and  $\omega$ B97X<sup>2</sup>. The calculated relative free energies are listed in Table S1. All structures were independently optimized using above six functionals with the same basis set described in computation details. We can see that the functionals without dispersion corrections, such as TPSS, B3LYP, and  $\omega$ B97X, have much higher relative free energies. For example, the relative free energy obtained by using the  $\omega$ B97X functional is 8.2 kcal/mol higher than the relative free energy obtained by using the  $\omega$ B97X-D functional. Such a large difference clearly indicates the importance of dispersion correction for this nickel catalytic system. This is not unexpected because this catalytic system has some important non-covalent interactions in the reaction. The difference of relative free energies obtained by using the M06 and  $\omega$ B97X-D functionals is only 0.9 kcal/mol. Therefore, we believe  $\omega$ B97X-D is a suitable functional for the computational study of this Ni catalytic system.

**Table S1.** Relative free energies calculated by using different functionals.

| Functionals     | $\Delta G$ (Kcal/mol)<br>( <b>A + L-lactate</b> $\rightarrow$ <b>TS<sub>1A,2A</sub></b> ) |
|-----------------|-------------------------------------------------------------------------------------------|
| TPSS            | 31.1                                                                                      |
| B3LYP           | 36.1                                                                                      |
| B3LYP-D3(BJ)    | 24.0                                                                                      |
| M06             | 27.8                                                                                      |
| M06-2X          | 27.8                                                                                      |
| $\omega$ B97X   | 35.1                                                                                      |
| $\omega$ B97X-D | 26.9                                                                                      |

### 3. Evaluation of Solvent effect

The relative free energies between **A + L-lactate** and **TS<sub>1A,2A</sub>** calculated by using the  $\omega$ B97X-D functional in water ( $\epsilon = 78.3553$ ), ethanol ( $\epsilon = 24.852$ ) and acetonitrile ( $\epsilon = 35.688$ ) are listed in Table S2. We can see the difference of relative free energies in those three solvents is less than 1.5 kcal/mol, which indicate a rather small influence of different solvent.

**Table S2.** Relative free energies calculated by using different solvent.

| Solvent      | $\Delta G$ (Kcal/mol)<br>( <b>A + L-lactate</b> $\rightarrow$ <b>TS<sub>1A,2A</sub></b> ) |
|--------------|-------------------------------------------------------------------------------------------|
| Ethanol      | 26.8                                                                                      |
| Acetonitrile | 28.3                                                                                      |
| Water        | 26.9                                                                                      |

#### 4. Absolute free energies (Hartree) and Cartesian coordinates (Ångström) of all structures optimized in water.

**A**

$G_{\text{solv}} = -2165.916837$

|    |             |             |             |
|----|-------------|-------------|-------------|
| Ni | 2.32839157  | -0.32851967 | 0.05250406  |
| C  | -0.99892877 | 2.04724963  | -0.68382215 |
| C  | 0.27279612  | 1.63024016  | -0.34205017 |
| C  | 0.02452064  | -2.04002189 | -0.88642256 |
| C  | 0.62603874  | 0.26835578  | -0.41060586 |
| C  | -0.37197256 | -0.62078948 | -0.84838314 |
| C  | -1.62632847 | -0.15895349 | -1.19600500 |
| C  | 1.34740501  | 2.52854282  | 0.12135299  |
| S  | 2.83487475  | 1.77981836  | 0.48483564  |
| S  | 1.63033717  | -2.37389569 | -0.42561419 |
| H  | -1.34500674 | 3.07353407  | -0.64108590 |
| H  | -2.43256676 | -0.78964559 | -1.55183475 |
| N  | 1.17364931  | 3.82240703  | 0.25042757  |
| Cl | 4.37133898  | -1.04505333 | 0.61127350  |
| N  | -0.80779245 | -2.98803095 | -1.24636321 |
| C  | -4.08086965 | 1.56604405  | 0.01144199  |
| C  | -3.31367895 | 1.59936906  | -1.31809719 |
| H  | -3.28487314 | 2.60496044  | -1.73705563 |
| H  | -3.76023516 | 0.92532704  | -2.04906355 |
| N  | -1.91437596 | 1.15624807  | -1.11574403 |
| C  | -3.95642771 | 0.24633637  | 0.70451289  |
| N  | -3.01940598 | 0.03036061  | 1.69925154  |
| C  | -4.60290185 | -0.92760615 | 0.41428964  |
| C  | -3.10617939 | -1.25412858 | 1.99132697  |
| N  | -4.04960545 | -1.87089603 | 1.24378568  |
| H  | -5.37840108 | -1.16785742 | -0.29675420 |
| H  | -2.52125410 | -1.77700481 | 2.73363643  |
| H  | -3.70912533 | 2.36098965  | 0.66437161  |
| H  | -5.12527690 | 1.78892754  | -0.22405178 |
| H  | -4.30189414 | -2.84851215 | 1.29201132  |
| H  | 1.93044437  | 4.41553050  | 0.57205034  |
| H  | 0.29513999  | 4.28193900  | 0.04333446  |
| H  | -0.51087251 | -3.95732581 | -1.26121993 |
| H  | -1.76532121 | -2.79961850 | -1.51837833 |

**1A**

$G_{\text{solv}} = -2508.949578$

|    |             |             |             |
|----|-------------|-------------|-------------|
| Ni | -0.86720558 | -2.31828217 | -0.44134199 |
| C  | 1.28055766  | 0.81945360  | -2.10762169 |
| C  | 0.89867619  | -0.44100031 | -1.69330470 |
| C  | -2.43149270 | 0.25137158  | -0.19706545 |
| C  | -0.34747872 | -0.64501692 | -1.07027849 |
| C  | -1.17162603 | 0.48472530  | -0.92286517 |
| C  | -0.77378727 | 1.71710243  | -1.40139644 |
| C  | 1.74279129  | -1.64457599 | -1.80423415 |
| S  | 1.06292721  | -3.08487083 | -1.20228287 |
| S  | -2.73560260 | -1.36031530 | 0.26513882  |
| H  | 2.24221411  | 1.05562746  | -2.54770346 |
| H  | -1.37598982 | 2.61636110  | -1.36173284 |
| N  | 2.94261218  | -1.61289364 | -2.33469287 |
| C  | 1.43132779  | 3.95123913  | -1.07038244 |
| C  | 0.90814343  | 3.22800764  | -2.31682310 |
| H  | 1.69082283  | 3.12358154  | -3.06712795 |
| H  | 0.06602440  | 3.76234923  | -2.75878085 |
| N  | 0.43690607  | 1.86384382  | -1.97762522 |
| C  | 0.36106496  | 4.20018305  | -0.05482915 |
| N  | 0.06899283  | 3.30362651  | 0.95746898  |
| C  | -0.54328986 | 5.22955093  | -0.02438113 |
| C  | -0.99261274 | 3.78960910  | 1.57600920  |
| N  | -1.39362943 | 4.95122017  | 1.01713343  |
| H  | -0.65442025 | 6.10742419  | -0.64183330 |
| H  | -1.49064513 | 3.34616472  | 2.42596798  |
| H  | 2.24875794  | 3.37147087  | -0.63052656 |
| H  | 1.84584595  | 4.90187509  | -1.41727569 |
| H  | -2.16831979 | 5.52156693  | 1.32884464  |
| C  | 1.38618080  | -0.05382421 | 1.94088404  |
| H  | 0.68032952  | -0.53741291 | 1.25127242  |
| C  | 1.71434230  | -1.10286353 | 3.01622163  |
| O  | 1.64334536  | -0.78450671 | 4.23389374  |
| O  | 2.05897458  | -2.24054603 | 2.58041495  |
| H  | 3.50419428  | -2.45503153 | -2.39035091 |
| H  | 3.35617889  | -0.76434457 | -2.70150217 |
| C  | 2.65343914  | 0.33225307  | 1.17729111  |
| H  | 3.07022504  | -0.53324279 | 0.65446839  |
| H  | 2.42837102  | 1.10453945  | 0.43466413  |
| H  | 3.40913546  | 0.72773203  | 1.86465567  |
| O  | 0.77273430  | 1.07873215  | 2.53279414  |
| H  | 0.62052423  | 1.76294892  | 1.84369682  |
| N  | -3.25332140 | 1.23065912  | 0.09847225  |
| H  | -4.10598033 | 1.05147041  | 0.61598595  |
| H  | -3.05316079 | 2.19644158  | -0.13325108 |

|    |             |             |            |
|----|-------------|-------------|------------|
| Cl | -1.49284225 | -4.32979758 | 0.30570273 |
|----|-------------|-------------|------------|

**TS<sub>1A,2A</sub>**

G<sub>solv</sub> = -2508.913641

|    |             |             |             |
|----|-------------|-------------|-------------|
| Ni | -0.60639187 | -2.41647051 | 0.27548777  |
| C  | -0.67399523 | 0.76203439  | -2.40248015 |
| C  | -0.43496381 | -0.46655838 | -1.85322789 |
| C  | -1.46571519 | 0.13293892  | 1.69044485  |
| C  | -0.53777509 | -0.67294036 | -0.42426416 |
| C  | -1.17191900 | 0.41056378  | 0.29086266  |
| C  | -1.44416291 | 1.59789647  | -0.33041362 |
| C  | -0.02895656 | -1.64735348 | -2.60920970 |
| S  | -0.03987534 | -3.12111553 | -1.74642530 |
| S  | -1.34833689 | -1.50679670 | 2.15699749  |
| H  | -0.55301875 | 0.99726885  | -3.45362379 |
| H  | -1.92982016 | 2.43688918  | 0.15569510  |
| N  | 0.32882809  | -1.59838030 | -3.87732301 |
| C  | 0.12039051  | 3.91190202  | -1.83678869 |
| C  | -1.16716155 | 3.15399740  | -2.19085184 |
| H  | -1.26971650 | 3.07562357  | -3.27308857 |
| H  | -2.04533362 | 3.66699235  | -1.79461009 |
| N  | -1.14971894 | 1.78752868  | -1.64205485 |
| C  | 0.20345611  | 4.30959726  | -0.39836330 |
| N  | 0.68170800  | 3.50279889  | 0.62096015  |
| C  | -0.22410700 | 5.46571900  | 0.18722430  |
| C  | 0.53105706  | 4.13707852  | 1.77647215  |
| N  | -0.00948324 | 5.33254533  | 1.53964564  |
| H  | -0.65737969 | 6.35465408  | -0.24193898 |
| H  | 0.80498869  | 3.75502295  | 2.74719302  |
| H  | 0.99028873  | 3.31365653  | -2.12367518 |
| H  | 0.13320229  | 4.82319662  | -2.44004988 |
| H  | -0.21985185 | 6.02439276  | 2.24845095  |
| C  | 1.84061152  | 0.12188644  | 0.37947414  |
| H  | 0.81779817  | -0.53690848 | 0.02362137  |
| C  | 2.56348845  | -1.03575467 | 1.13175392  |
| O  | 2.59060347  | -0.98583929 | 2.39036562  |
| O  | 3.07523514  | -1.94823127 | 0.42374432  |
| H  | 0.59100166  | -2.44284215 | -4.37087937 |
| H  | 0.38080009  | -0.73059859 | -4.39500609 |
| C  | 2.46633865  | 0.48301961  | -0.96100045 |
| H  | 2.52771124  | -0.37503295 | -1.63507784 |
| H  | 1.88024888  | 1.27172142  | -1.44202613 |
| H  | 3.48014002  | 0.86445352  | -0.79412913 |

|    |             |             |            |
|----|-------------|-------------|------------|
| O  | 1.43933542  | 1.12650214  | 1.12570393 |
| H  | 1.03562490  | 2.46707934  | 0.61984716 |
| N  | -1.79658476 | 1.07538661  | 2.55316156 |
| H  | -1.98582543 | 0.84143997  | 3.51981789 |
| H  | -1.75663437 | 2.06016106  | 2.31951170 |
| Cl | -0.57164754 | -4.49306874 | 1.14530143 |

## 2A

$G_{\text{solv}} = -2508.944305$

|    |             |             |             |
|----|-------------|-------------|-------------|
| Ni | -0.82416779 | -2.60484635 | -0.06148327 |
| C  | 0.91416024  | 0.71360181  | -1.74036040 |
| C  | 0.83871637  | -0.45713733 | -1.05533636 |
| C  | -2.68542248 | -0.21074560 | 0.21982901  |
| C  | -0.29177472 | -0.76502838 | -0.11835219 |
| C  | -1.41480471 | 0.20522450  | -0.32163486 |
| C  | -1.27449472 | 1.33704111  | -1.05136717 |
| C  | 1.76555983  | -1.53965296 | -1.26993423 |
| S  | 1.18553319  | -3.09546984 | -0.84781699 |
| S  | -2.85381168 | -1.89304425 | 0.48349182  |
| H  | 1.72222511  | 0.95428361  | -2.42374962 |
| H  | -2.08651195 | 2.03372491  | -1.23393864 |
| N  | 2.98645033  | -1.37321848 | -1.76374940 |
| C  | 0.52155233  | 4.04950765  | -1.48824421 |
| C  | 0.03309285  | 2.91760269  | -2.40443145 |
| H  | 0.73722549  | 2.78756943  | -3.22808142 |
| H  | -0.94107143 | 3.17258800  | -2.82792203 |
| N  | -0.09805012 | 1.64030566  | -1.70337453 |
| C  | -0.36873131 | 4.24329665  | -0.30768591 |
| N  | -0.20769378 | 3.54328049  | 0.87453861  |
| C  | -1.50844094 | 4.97699039  | -0.15928382 |
| C  | -1.20819578 | 3.82162344  | 1.70187259  |
| N  | -2.00464907 | 4.69727443  | 1.09572601  |
| H  | -2.00202438 | 5.65748270  | -0.83373999 |
| H  | -1.34327000 | 3.41929521  | 2.69302351  |
| H  | 1.54116906  | 3.84011771  | -1.15485338 |
| H  | 0.54468284  | 4.97105859  | -2.07506581 |
| H  | -2.83945309 | 5.09337083  | 1.51133836  |
| C  | 2.50296489  | 1.09026329  | 1.34260229  |
| H  | 0.06494112  | -0.70397865 | 0.92443535  |
| C  | 3.02594865  | -0.32063452 | 1.76135624  |
| O  | 2.25647886  | -1.00816759 | 2.47259278  |
| O  | 4.17573730  | -0.62429752 | 1.35676453  |

|    |             |             |             |
|----|-------------|-------------|-------------|
| H  | 3.59038709  | -2.16936115 | -1.91686319 |
| H  | 3.38488209  | -0.45279540 | -1.89206883 |
| C  | 3.35884176  | 1.93660731  | 0.46104120  |
| H  | 3.58197863  | 1.40851510  | -0.47093468 |
| H  | 2.86230718  | 2.88471810  | 0.25156805  |
| H  | 4.31692692  | 2.11861010  | 0.95897200  |
| O  | 1.42111415  | 1.47024718  | 1.77173343  |
| H  | 0.53293385  | 2.85577498  | 1.09319548  |
| N  | -3.65651513 | 0.64220801  | 0.52049595  |
| H  | -4.54913282 | 0.30878016  | 0.85898001  |
| H  | -3.51459713 | 1.64261869  | 0.47369970  |
| Cl | -1.35598331 | -4.81253042 | 0.32047839  |

### 3A

$G_{\text{solv}} = -2167.102813$

|    |             |             |             |
|----|-------------|-------------|-------------|
| Ni | -0.27496656 | -2.27626086 | 0.10277983  |
| C  | 1.96062337  | 1.07549382  | -0.79762262 |
| C  | 1.60413014  | -0.09592217 | -0.21533756 |
| C  | -2.09774493 | -0.02837683 | -0.84561987 |
| C  | 0.16981667  | -0.41454473 | 0.10499484  |
| C  | -0.74598977 | 0.45690889  | -0.70749066 |
| C  | -0.30919751 | 1.59880110  | -1.29169868 |
| C  | 2.55272124  | -1.13887956 | 0.09420702  |
| S  | 1.88117035  | -2.69027286 | 0.36428557  |
| S  | -2.33123836 | -1.67842426 | -0.45460087 |
| H  | 2.98741889  | 1.36769091  | -0.99578475 |
| H  | -0.94565613 | 2.26799783  | -1.86207952 |
| N  | 3.86080824  | -0.93410858 | 0.18385285  |
| C  | 1.40452154  | 4.14488651  | -0.15711818 |
| C  | 1.38502133  | 3.36135174  | -1.48599465 |
| H  | 2.36924631  | 3.40262481  | -1.95644187 |
| H  | 0.65512924  | 3.79657312  | -2.17093246 |
| N  | 1.01984880  | 1.96295083  | -1.26955053 |
| C  | 0.18365932  | 3.86374608  | 0.65259659  |
| N  | 0.14426906  | 2.84129829  | 1.58480319  |
| C  | -1.08965966 | 4.34572838  | 0.58027183  |
| C  | -1.09222864 | 2.68569792  | 2.04544089  |
| N  | -1.85250531 | 3.60055109  | 1.45376590  |
| H  | -1.51097039 | 5.13577506  | -0.01949033 |
| H  | -1.41518729 | 1.96287546  | 2.77735015  |
| H  | 2.28971884  | 3.86678730  | 0.42229846  |
| H  | 1.46909827  | 5.21203523  | -0.38089601 |
| H  | -2.84375805 | 3.71890118  | 1.62882880  |



|    |             |             |             |
|----|-------------|-------------|-------------|
| H  | 4.49287777  | -1.70361073 | 0.36001575  |
| H  | 4.26552832  | -0.01355391 | 0.07820360  |
| H  | 0.92502798  | 2.24073794  | 1.83002988  |
| H  | -0.01103211 | -0.22744003 | 1.18047710  |
| Cl | -0.86735676 | -4.47309604 | 0.43826930  |
| N  | -3.11478742 | 0.73669201  | -1.22290967 |
| H  | -4.03806907 | 0.34289240  | -1.34538399 |
| H  | -3.00162777 | 1.72577197  | -1.39906912 |

#### 4A

$G_{\text{solv}} = -2508.950425$

|    |             |             |             |
|----|-------------|-------------|-------------|
| Ni | -0.44414647 | -2.62208972 | 0.45372093  |
| C  | -1.18342031 | 0.56120077  | -2.04743783 |
| C  | -0.62183821 | -0.59573374 | -1.61288982 |
| C  | -0.92881330 | -0.09615880 | 2.09802633  |
| C  | -0.28166345 | -0.82467609 | -0.17488310 |
| C  | -0.90739375 | 0.21885021  | 0.69195950  |
| C  | -1.48908808 | 1.33091095  | 0.18159171  |
| C  | -0.39392030 | -1.73094317 | -2.47072844 |
| S  | -0.29084062 | -3.24388198 | -1.67061502 |
| S  | -0.76377675 | -1.75836112 | 2.47754262  |
| H  | -1.42883761 | 0.75143836  | -3.08724559 |
| H  | -1.97606643 | 2.08281660  | 0.79490696  |
| N  | -0.25934329 | -1.63795952 | -3.78740852 |
| C  | -1.01149662 | 3.91529489  | -1.70973770 |
| C  | -2.09169012 | 2.82368535  | -1.67449474 |
| H  | -2.48297825 | 2.66517626  | -2.68058232 |
| H  | -2.92100759 | 3.13505493  | -1.03438260 |
| N  | -1.58382638 | 1.54453067  | -1.17479907 |
| C  | -0.48515141 | 4.22971265  | -0.34893285 |
| N  | 0.59369982  | 3.56880313  | 0.20877823  |
| C  | -0.97336107 | 5.05482688  | 0.62111537  |
| C  | 0.75087738  | 3.95876023  | 1.46703785  |
| N  | -0.18482979 | 4.86796310  | 1.73513099  |
| H  | -1.80577967 | 5.73949979  | 0.61392162  |
| H  | 1.50928690  | 3.61759842  | 2.15211400  |
| H  | -0.19370127 | 3.60323955  | -2.36560722 |
| H  | -1.46077793 | 4.81599181  | -2.13566352 |
| H  | -0.28228681 | 5.34436870  | 2.62364194  |
| C  | 2.73764797  | 0.50769163  | 0.49248556  |
| C  | 2.53149140  | 0.75865190  | -1.03574376 |
| O  | 1.93912914  | 1.82650431  | -1.35108572 |

|    |             |             |             |
|----|-------------|-------------|-------------|
| O  | 2.96697264  | -0.11398715 | -1.81773993 |
| H  | -0.14440914 | -2.46767981 | -4.35323083 |
| H  | -0.23386076 | -0.74232288 | -4.25592722 |
| C  | 3.44177370  | -0.74311232 | 0.91067237  |
| H  | 4.47763212  | -0.70577830 | 0.55486190  |
| H  | 3.42832742  | -0.83549618 | 1.99754055  |
| H  | 2.97847025  | -1.61960110 | 0.44861356  |
| O  | 2.33402108  | 1.33992923  | 1.28912651  |
| H  | 1.16997714  | 2.83515560  | -0.27324955 |
| H  | 0.81370944  | -0.80860189 | -0.05050729 |
| N  | -1.04358684 | 0.82937688  | 3.04194853  |
| H  | -1.09559535 | 0.57000207  | 4.01764861  |
| H  | -1.02950730 | 1.81587721  | 2.81767517  |
| Cl | -0.30306567 | -4.77556919 | 1.24377902  |

**TS<sub>4A,5A</sub>**

G<sub>solv</sub> = -2508.914085

|    |             |             |             |
|----|-------------|-------------|-------------|
| Ni | 0.59591914  | -2.51901565 | 0.33047389  |
| C  | -1.96058779 | 0.60891719  | 1.32485168  |
| C  | -1.50305713 | -0.60355702 | 0.88691900  |
| C  | 2.18497291  | 0.02406367  | 0.81561120  |
| C  | -0.10791770 | -0.79030005 | 0.54904955  |
| C  | 0.76028388  | 0.28123153  | 0.97551986  |
| C  | 0.24530726  | 1.44505063  | 1.47518444  |
| C  | -2.33432914 | -1.78989265 | 0.70024059  |
| S  | -1.49136901 | -3.25083173 | 0.42089246  |
| S  | 2.61018296  | -1.59311163 | 0.46287961  |
| H  | -3.00051796 | 0.83046845  | 1.53618732  |
| H  | 0.85090018  | 2.27088481  | 1.83048257  |
| N  | -3.65063653 | -1.76027823 | 0.75417792  |
| C  | -1.63512973 | 3.83292887  | 0.58801897  |
| C  | -1.60967087 | 2.98034882  | 1.86426808  |
| H  | -2.61853454 | 2.87831283  | 2.26348068  |
| H  | -0.97770849 | 3.43698409  | 2.62857750  |
| N  | -1.09401835 | 1.62597921  | 1.59568082  |
| C  | -0.27612622 | 4.21072438  | 0.09283318  |
| N  | 0.50401613  | 3.43068784  | -0.74545484 |
| C  | 0.47000317  | 5.30976710  | 0.40539599  |
| C  | 1.67829365  | 4.02352608  | -0.91684645 |
| N  | 1.67950072  | 5.16909245  | -0.23593659 |
| H  | 0.24112562  | 6.16445542  | 1.02122917  |
| H  | 2.49412999  | 3.64809968  | -1.51409573 |
| H  | -2.19304294 | 3.30772550  | -0.19179551 |
| H  | -2.17651018 | 4.75186950  | 0.82686491  |

|    |             |             |             |
|----|-------------|-------------|-------------|
| H  | 2.44769038  | 5.82845854  | -0.21483622 |
| C  | -0.02720146 | 0.05237118  | -1.95686105 |
| C  | -1.54370310 | 0.34507915  | -2.13721364 |
| O  | -1.92272332 | 1.54102108  | -2.02152934 |
| O  | -2.29934015 | -0.64115195 | -2.36468816 |
| H  | -4.18875850 | -2.60832732 | 0.62629036  |
| H  | -4.16931633 | -0.89733890 | 0.85368885  |
| C  | 0.52447603  | -1.02095732 | -2.89216402 |
| H  | 0.49489633  | -0.65012599 | -3.92377579 |
| H  | 1.56402607  | -1.23089012 | -2.62605899 |
| H  | -0.04825589 | -1.94934600 | -2.83827658 |
| O  | 0.75449022  | 1.09122637  | -1.76748074 |
| H  | 0.34674564  | 2.43658471  | -1.14636485 |
| H  | -0.10887386 | -0.58903771 | -0.87633140 |
| N  | 3.09545782  | 0.97203403  | 0.93035153  |
| H  | 4.07762891  | 0.75944215  | 0.81047542  |
| H  | 2.84659197  | 1.94688934  | 1.04654744  |
| Cl | 1.43162879  | -4.57333869 | -0.05981773 |

## 5A

$G_{\text{solv}} = -2508.953478$

|    |             |             |             |
|----|-------------|-------------|-------------|
| Ni | -0.69561176 | -2.46638070 | -0.45856161 |
| C  | 1.79839995  | 0.68042192  | -1.52369736 |
| C  | 1.33405055  | -0.57344374 | -1.17439094 |
| C  | -2.28904969 | 0.08664530  | -0.69224423 |
| C  | -0.03481682 | -0.78955529 | -0.92815934 |
| C  | -0.88125742 | 0.32641889  | -1.05186867 |
| C  | -0.38643146 | 1.54563012  | -1.47055085 |
| C  | 2.18671370  | -1.76701527 | -1.02454544 |
| S  | 1.37404255  | -3.22064215 | -0.66102301 |
| S  | -2.69465594 | -1.52322783 | -0.30890188 |
| H  | 2.84031567  | 0.92410709  | -1.69509074 |
| H  | -0.99595624 | 2.41949421  | -1.66562208 |
| N  | 3.48833771  | -1.72154427 | -1.17707060 |
| C  | 1.57300460  | 3.93231871  | -0.77834451 |
| C  | 1.45252045  | 3.05225028  | -2.02760156 |
| H  | 2.42345000  | 2.91646252  | -2.50253878 |
| H  | 0.76621833  | 3.49127432  | -2.75310457 |
| N  | 0.93429824  | 1.70149557  | -1.69747396 |
| C  | 0.25285057  | 4.22665088  | -0.13828267 |
| N  | -0.28327267 | 3.42496421  | 0.85215827  |
| C  | -0.64918987 | 5.20246897  | -0.47565519 |
| C  | -1.48627890 | 3.91126533  | 1.09626180  |
| N  | -1.74851189 | 4.98505682  | 0.31854752  |

|    |             |             |             |
|----|-------------|-------------|-------------|
| H  | -0.60737586 | 6.00540867  | -1.19540731 |
| H  | -2.19083084 | 3.53064026  | 1.82145009  |
| H  | 2.24466679  | 3.45223268  | -0.06063183 |
| H  | 2.04444340  | 4.86291296  | -1.10711216 |
| H  | -2.59279379 | 5.54120553  | 0.33948931  |
| C  | 0.36284705  | -0.20936019 | 2.42076671  |
| C  | 1.84153802  | 0.09888274  | 2.12774088  |
| O  | 2.15178264  | 1.27789247  | 1.80701170  |
| O  | 2.64601807  | -0.87128773 | 2.21770004  |
| H  | 4.04938768  | -2.55794800 | -1.06354313 |
| H  | 3.98402268  | -0.86275160 | -1.38181163 |
| C  | 0.17058977  | -0.75637285 | 3.82983812  |
| H  | 0.51968313  | -0.03303271 | 4.57459086  |
| H  | -0.89053921 | -0.95581171 | 4.00684740  |
| H  | 0.72110563  | -1.69114755 | 3.95977104  |
| O  | -0.47848710 | 0.91960510  | 2.25485965  |
| H  | -0.04548733 | 1.59700427  | 1.69722548  |
| H  | 0.06785929  | -0.98889192 | 1.70073778  |
| N  | -3.16977838 | 1.05786163  | -0.64368163 |
| H  | -4.12880143 | 0.87142820  | -0.37413374 |
| H  | -2.92226057 | 2.02504905  | -0.81681973 |
| Cl | -1.48559569 | -4.47851814 | 0.11380578  |

### L-lactate

$G_{\text{solv}} = -343.03961$

|   |             |             |             |
|---|-------------|-------------|-------------|
| O | 1.26101311  | 1.17798253  | 0.20825878  |
| H | 1.77945474  | 0.43063880  | -0.13948299 |
| C | -0.04688727 | -0.85690136 | 0.04457971  |
| O | -1.10924906 | -1.50306286 | 0.24559840  |
| O | 1.02724701  | -1.32410951 | -0.43274308 |
| C | -0.04151580 | 0.63845367  | 0.40957343  |
| H | -0.28891064 | 0.71311104  | 1.47608496  |
| C | -1.06939197 | 1.41825413  | -0.40331026 |
| H | -2.08036205 | 1.06048294  | -0.19063861 |
| H | -1.01958320 | 2.47980702  | -0.14403809 |
| H | -0.87591707 | 1.31064023  | -1.47589525 |

### Pyruvate

$G_{\text{solv}} = -341.844773$

|   |             |            |             |
|---|-------------|------------|-------------|
| C | -0.01714075 | 0.65777085 | -0.26595406 |
| C | 0.14874749  | 1.66114483 | 0.83068513  |
| H | 0.20288493  | 2.66901766 | 0.41657607  |
| H | -0.69687016 | 1.58807501 | 1.52231998  |
| H | 1.05149941  | 1.43806007 | 1.40805392  |

|   |             |             |             |
|---|-------------|-------------|-------------|
| O | -0.17937475 | 0.97826041  | -1.43403702 |
| C | 0.00276868  | -0.85567057 | 0.11561665  |
| O | 0.19910240  | -1.66496657 | -0.82317124 |
| O | -0.19019848 | -1.12262177 | 1.32857873  |

### D-lactate

$G_{\text{solv}} = -343.03961$

|   |             |             |             |
|---|-------------|-------------|-------------|
| C | -0.04023328 | 0.63891938  | -0.41012033 |
| H | -0.28443510 | 0.71411302  | -1.47731801 |
| C | -1.07038277 | 1.41609745  | 0.40155230  |
| H | -1.01839596 | 2.47883930  | 0.14730875  |
| H | -2.08107839 | 1.06095067  | 0.18338429  |
| H | -0.87995854 | 1.30267318  | 1.47413102  |
| O | 1.26131060  | 1.17919693  | -0.20447083 |
| H | 1.77909809  | 0.43364532  | 0.14749089  |
| C | -0.04654252 | -0.85614746 | -0.04537552 |
| O | 1.02801135  | -1.32680577 | 0.42812608  |
| O | -1.11085678 | -1.50032087 | -0.24257221 |

### B

$G_{\text{solv}} = -1838.260892$

|    |             |             |             |
|----|-------------|-------------|-------------|
| Ni | 0.29539746  | -2.33161206 | -0.04891797 |
| C  | -1.96074531 | 1.09178801  | 0.73866392  |
| C  | -1.59712315 | -0.19895893 | 0.39533966  |
| C  | 2.08324933  | -0.09430039 | 1.04464629  |
| C  | -0.25485880 | -0.60476829 | 0.48015146  |
| C  | 0.65936340  | 0.33350062  | 0.95496246  |
| C  | 0.26154555  | 1.60710494  | 1.30071616  |
| C  | -2.52752899 | -1.22800154 | -0.09865956 |
| S  | -1.83238942 | -2.73431913 | -0.52083574 |
| S  | 2.34488801  | -1.74909739 | 0.50478956  |
| H  | -2.96824774 | 1.48702274  | 0.66865077  |
| H  | 0.94858782  | 2.36200386  | 1.66490792  |
| N  | -3.81430312 | -1.02745265 | -0.21462736 |
| C  | -1.37937193 | 4.07900646  | -0.03944928 |
| C  | -1.40474444 | 3.39073925  | 1.33412372  |
| H  | -2.39589142 | 3.43423988  | 1.78616309  |
| H  | -0.68204606 | 3.83769442  | 2.01627294  |
| N  | -1.03508191 | 1.96315397  | 1.18611234  |
| C  | -0.11530197 | 3.79777437  | -0.78903990 |
| N  | -0.05385334 | 2.80782495  | -1.75333471 |
| C  | 1.13540679  | 4.32180018  | -0.58283147 |
| C  | 1.21493305  | 2.74413820  | -2.11223225 |
| N  | 1.96829074  | 3.63918660  | -1.43420738 |

|   |             |             |             |
|---|-------------|-------------|-------------|
| H | 1.49490024  | 5.09092081  | 0.08328312  |
| H | 1.63223738  | 2.08056611  | -2.85536735 |
| H | -2.23365587 | 3.73659243  | -0.63058032 |
| H | -1.50640742 | 5.14992092  | 0.14112452  |
| H | 2.96390174  | 3.77898459  | -1.53995364 |
| O | 2.98141729  | 0.63056168  | 1.44803802  |
| C | 0.86382254  | -4.00203426 | -0.59330832 |
| O | 1.22234710  | -5.02221795 | -0.93116669 |
| H | -4.42409566 | -1.76024968 | -0.56205252 |
| H | -4.25774747 | -0.15036583 | 0.03292534  |

**TS<sub>4B,5B</sub>**

G<sub>solv</sub> = -2181.256709

|    |             |             |             |
|----|-------------|-------------|-------------|
| Ni | 0.55989035  | -2.60656219 | 0.30659652  |
| C  | -1.90397813 | 0.61847784  | 1.31825432  |
| C  | -1.47974540 | -0.61409102 | 0.89057754  |
| C  | 2.24507951  | -0.12532198 | 1.03561763  |
| C  | -0.08407270 | -0.84599794 | 0.60390625  |
| C  | 0.80092173  | 0.16890608  | 1.08581054  |
| C  | 0.32574600  | 1.36243139  | 1.54394093  |
| C  | -2.34705729 | -1.75816303 | 0.65499288  |
| S  | -1.55634871 | -3.25455269 | 0.36057563  |
| S  | 2.59128088  | -1.78382973 | 0.54836251  |
| H  | -2.94274698 | 0.87915706  | 1.48752853  |
| H  | 0.97625024  | 2.15926485  | 1.88839096  |
| N  | -3.65962873 | -1.69504070 | 0.67431793  |
| C  | -1.57693761 | 3.80490556  | 0.61061569  |
| C  | -1.49438877 | 2.96511850  | 1.89067108  |
| H  | -2.48281195 | 2.87970205  | 2.34223935  |
| H  | -0.81903414 | 3.41953814  | 2.61760431  |
| N  | -1.01149221 | 1.60012740  | 1.61535780  |
| C  | -0.25026461 | 4.22912106  | 0.06969455  |
| N  | 0.56657831  | 3.45072898  | -0.73403631 |
| C  | 0.41264672  | 5.40403955  | 0.27443278  |
| C  | 1.67997292  | 4.12315558  | -0.99650735 |
| N  | 1.60914159  | 5.31195391  | -0.39911106 |
| H  | 0.13154271  | 6.28327651  | 0.83119380  |
| H  | 2.50582174  | 3.76984942  | -1.59344157 |
| H  | -2.14278190 | 3.25885467  | -0.14956173 |
| H  | -2.13955203 | 4.70890117  | 0.85728507  |
| H  | 2.32563866  | 6.02588006  | -0.44455700 |
| C  | 0.10763571  | 0.03248523  | -1.89984321 |
| C  | -1.40329860 | 0.32208331  | -2.13464410 |
| O  | -1.79242825 | 1.51525242  | -2.02511208 |

|   |             |             |             |
|---|-------------|-------------|-------------|
| O | -2.14557339 | -0.66605042 | -2.39563462 |
| H | -4.22037847 | -2.52225969 | 0.50787903  |
| H | -4.15694001 | -0.82111450 | 0.79098542  |
| C | 0.69972498  | -1.02051571 | -2.83471268 |
| H | 0.71417094  | -0.62686936 | -3.85809532 |
| H | 1.72711604  | -1.23584863 | -2.52890985 |
| H | 0.12616548  | -1.95010378 | -2.82502804 |
| O | 0.87848329  | 1.07057358  | -1.66480561 |
| H | 0.45322269  | 2.43292848  | -1.08215462 |
| H | -0.01598342 | -0.62211477 | -0.83756108 |
| O | 3.12909904  | 0.68311499  | 1.31118547  |
| C | 1.20855403  | -4.26921611 | -0.10980424 |
| O | 1.62404834  | -5.29040039 | -0.38128621 |

### C

$G_{\text{solv}} = -4964.423596$

|    |             |             |             |
|----|-------------|-------------|-------------|
| Pd | 1.55006322  | 0.12473933  | 1.02138132  |
| C  | -0.65663344 | -0.50546694 | -2.51212845 |
| C  | 0.40613908  | -0.36236015 | -1.63462533 |
| C  | -1.38701714 | -0.67678933 | 1.64488189  |
| C  | 0.15890827  | -0.36602687 | -0.23970922 |
| C  | -1.15253829 | -0.66169215 | 0.20071589  |
| C  | -2.16182600 | -0.82445877 | -0.73482719 |
| C  | 1.78545763  | -0.12895373 | -2.06588422 |
| S  | 2.88202420  | 0.27126709  | -0.87412938 |
| S  | -0.11165817 | -0.20151271 | 2.61046733  |
| H  | -0.56951898 | -0.40544483 | -3.58823929 |
| H  | -3.20164900 | -0.98353731 | -0.47581986 |
| C  | -3.47613073 | 0.81214702  | -3.17587885 |
| C  | -3.04160306 | -0.65022843 | -3.00014666 |
| H  | -2.72067420 | -1.08827225 | -3.94511553 |
| H  | -3.84720198 | -1.25530861 | -2.58461143 |
| N  | -1.90318996 | -0.73280013 | -2.05440738 |
| C  | -3.71865197 | 1.49381106  | -1.86638107 |
| N  | -2.73232615 | 2.23134556  | -1.23560496 |
| C  | -4.82226358 | 1.40847030  | -1.05663597 |
| C  | -3.24167757 | 2.57247628  | -0.06643690 |
| N  | -4.50147616 | 2.10364812  | 0.08223164  |
| H  | -5.77645638 | 0.92121461  | -1.18580192 |
| H  | -2.74857754 | 3.16091305  | 0.69342447  |
| H  | -2.70751256 | 1.35228523  | -3.73630341 |
| H  | -4.38461522 | 0.79679952  | -3.78439061 |
| H  | -5.09397140 | 2.23535688  | 0.89050584  |
| Br | 3.32488384  | 0.77654667  | 2.63544999  |

|   |             |             |             |
|---|-------------|-------------|-------------|
| P | 2.25094579  | -0.18039047 | -3.82598216 |
| P | -3.02137519 | -1.07706200 | 2.34370976  |
| C | -2.68275777 | -1.24359064 | 4.13535889  |
| H | -3.59912568 | -1.62832882 | 4.59305625  |
| H | -1.86379538 | -1.94036564 | 4.33882649  |
| H | -2.46449124 | -0.27158048 | 4.58374579  |
| C | -3.17954124 | -2.84796610 | 1.83864715  |
| H | -4.06202251 | -3.24060667 | 2.35147377  |
| H | -3.33742015 | -2.95039422 | 0.76361915  |
| H | -2.30081821 | -3.42368254 | 2.14044649  |
| C | 4.08043409  | -0.11907166 | -3.78144584 |
| H | 4.50473159  | -0.87833586 | -3.11731783 |
| H | 4.42512141  | -0.30731444 | -4.80277715 |
| H | 4.42881878  | 0.87306135  | -3.48477049 |
| C | 1.94762215  | -1.96619817 | -4.19876436 |
| H | 2.47151117  | -2.60998954 | -3.48747006 |
| H | 0.88151412  | -2.20090929 | -4.19452311 |
| H | 2.33431872  | -2.14695077 | -5.20554285 |

#### 4C

$G_{\text{solv}} = -5307.471411$

|    |             |             |             |
|----|-------------|-------------|-------------|
| Pd | -0.26404293 | -2.14867208 | 0.83072995  |
| C  | -1.41929890 | 0.68317050  | -2.06758347 |
| C  | -0.83222656 | -0.43193457 | -1.53182781 |
| C  | -0.51964867 | 0.74424960  | 2.05932218  |
| C  | -0.26841890 | -0.39033222 | -0.14838111 |
| C  | -0.72863015 | 0.79242850  | 0.64642786  |
| C  | -1.34405537 | 1.83411836  | 0.01060922  |
| C  | -0.75631370 | -1.66958665 | -2.23012640 |
| S  | -0.53158405 | -3.05213812 | -1.28585321 |
| S  | -0.27537512 | -0.80107071 | 2.70908929  |
| H  | -1.80609382 | 0.72025058  | -3.08015300 |
| H  | -1.69165309 | 2.71914758  | 0.52149150  |
| C  | -1.12961794 | 4.00291213  | -2.37316401 |
| C  | -2.21287271 | 3.00243143  | -1.95249025 |
| H  | -2.78133306 | 2.68591419  | -2.82700236 |
| H  | -2.90330647 | 3.46116443  | -1.24203008 |
| N  | -1.64441219 | 1.80100430  | -1.32149973 |
| C  | -0.38702367 | 4.58668197  | -1.21664035 |
| N  | 0.73844436  | 3.99874238  | -0.66811171 |
| C  | -0.65697491 | 5.68483619  | -0.45417143 |
| C  | 1.13693256  | 4.70087808  | 0.38511362  |
| N  | 0.31054286  | 5.73603532  | 0.52538040  |
| H  | -1.44076699 | 6.42124540  | -0.52696033 |



|    |             |             |             |
|----|-------------|-------------|-------------|
| H  | 1.98717525  | 4.48623437  | 1.01138457  |
| H  | -0.43036461 | 3.52041701  | -3.06252528 |
| H  | -1.62777110 | 4.81193112  | -2.91316526 |
| H  | 0.38381504  | 6.43350436  | 1.25603751  |
| C  | 2.87640803  | 1.00755069  | 0.00642668  |
| C  | 2.56880149  | 0.98026078  | -1.52254587 |
| O  | 1.82810161  | 1.90274556  | -1.96020602 |
| O  | 3.09240961  | 0.06008593  | -2.18581464 |
| C  | 3.50535500  | -0.20143257 | 0.62127176  |
| H  | 4.54154614  | -0.27499230 | 0.27154964  |
| H  | 3.49132723  | -0.11852791 | 1.70908622  |
| H  | 2.99432060  | -1.11354269 | 0.30055024  |
| O  | 2.62129338  | 2.01836843  | 0.64089630  |
| H  | 1.21115001  | 3.13391542  | -1.03342715 |
| H  | 0.83104812  | -0.37310125 | -0.21797930 |
| Br | 0.11428299  | -4.37060486 | 2.05483071  |
| P  | -0.94007133 | -1.74253124 | -4.05775543 |
| P  | -0.20361757 | 2.19143999  | 3.14584672  |
| C  | -0.75332578 | 1.57592695  | 4.79140415  |
| H  | -0.06254067 | 0.82475684  | 5.17869881  |
| H  | -0.73764142 | 2.43287761  | 5.47208712  |
| H  | -1.76630847 | 1.16294574  | 4.76090124  |
| C  | -1.55352344 | 3.40453249  | 2.80523019  |
| H  | -1.33253836 | 4.02769614  | 1.93668153  |
| H  | -2.53198505 | 2.92900852  | 2.69262122  |
| H  | -1.58237065 | 4.06561786  | 3.67708109  |
| C  | 0.60875163  | -0.87008003 | -4.55999173 |
| H  | 1.49064444  | -1.33775413 | -4.11330892 |
| H  | 0.68687933  | -0.92019498 | -5.65030137 |
| H  | 0.56375083  | 0.18127220  | -4.26521677 |
| C  | -0.49906489 | -3.47971528 | -4.45361329 |
| H  | 0.46298350  | -3.77533522 | -4.02412942 |
| H  | -1.27854941 | -4.16665728 | -4.11462959 |
| H  | -0.43664820 | -3.55144922 | -5.54414818 |

**TS<sub>4c,5c</sub>**

G<sub>solv</sub> = -5307.422573

|    |             |             |             |
|----|-------------|-------------|-------------|
| Pd | -0.19297788 | -2.00852712 | 0.97012163  |
| C  | -1.33567376 | 0.67176703  | -2.09461720 |
| C  | -0.88687543 | -0.45608832 | -1.44765589 |
| C  | -0.53832431 | 0.91232862  | 2.05311094  |
| C  | -0.49691274 | -0.36699095 | -0.05593928 |
| C  | -0.80496561 | 0.86723005  | 0.62917141  |
| C  | -1.28284841 | 1.93226879  | -0.09913478 |

|    |             |             |             |
|----|-------------|-------------|-------------|
| C  | -0.77195930 | -1.75188508 | -2.08610822 |
| S  | -0.42342464 | -3.05140425 | -1.08593389 |
| S  | -0.19065879 | -0.56511747 | 2.78254756  |
| H  | -1.62640970 | 0.69036723  | -3.13790182 |
| H  | -1.53120128 | 2.88875423  | 0.33489669  |
| C  | -0.51933333 | 3.84460147  | -2.51139891 |
| C  | -1.80450755 | 3.07365512  | -2.18602046 |
| H  | -2.30999738 | 2.78165866  | -3.10580999 |
| H  | -2.48877362 | 3.67717396  | -1.58747795 |
| N  | -1.50689905 | 1.84013191  | -1.42931333 |
| C  | 0.09822123  | 4.51649602  | -1.32726357 |
| N  | 0.96981418  | 3.91013609  | -0.43733277 |
| C  | -0.10753830 | 5.78563378  | -0.86951294 |
| C  | 1.26472719  | 4.77257220  | 0.52726475  |
| N  | 0.63338785  | 5.92074760  | 0.28191003  |
| H  | -0.70816051 | 6.58856083  | -1.26556733 |
| H  | 1.91907852  | 4.58587750  | 1.36376982  |
| H  | 0.19857506  | 3.17279680  | -2.99021825 |
| H  | -0.78788406 | 4.61742990  | -3.23588742 |
| H  | 0.69370442  | 6.74925638  | 0.86069474  |
| C  | 2.09334085  | 0.45048390  | -0.28902519 |
| C  | 2.23441582  | 0.36819360  | -1.83602196 |
| O  | 2.01971797  | 1.41776318  | -2.49925426 |
| O  | 2.52601549  | -0.75871805 | -2.32571836 |
| C  | 3.05752089  | -0.45630774 | 0.47641243  |
| H  | 4.08603350  | -0.10974979 | 0.32077172  |
| H  | 2.83038887  | -0.40124806 | 1.54471953  |
| H  | 2.98679590  | -1.49807772 | 0.15651312  |
| O  | 1.95716197  | 1.66159618  | 0.22887585  |
| H  | 1.33819019  | 2.88165602  | -0.37647323 |
| H  | 1.03526705  | -0.14413983 | -0.19393474 |
| Br | 0.25769683  | -4.09849834 | 2.27933507  |
| P  | -1.19055510 | -2.00925505 | -3.84861226 |
| P  | -0.31552896 | 2.43099344  | 3.04424924  |
| C  | -0.76188509 | 1.86965120  | 4.73622566  |
| H  | -0.00414621 | 1.19190291  | 5.13373969  |
| H  | -0.77775904 | 2.76322622  | 5.36751356  |
| H  | -1.74482614 | 1.39031085  | 4.76730195  |
| C  | -1.74348472 | 3.53230408  | 2.65039899  |
| H  | -1.51313070 | 4.20126976  | 1.81782797  |
| H  | -2.66889697 | 2.98343424  | 2.45796151  |
| H  | -1.88331286 | 4.15637174  | 3.53846089  |
| C  | 0.11366856  | -1.04727804 | -4.73317306 |
| H  | 1.11319098  | -1.39762005 | -4.46581908 |

|   |             |             |             |
|---|-------------|-------------|-------------|
| H | -0.05454909 | -1.20517257 | -5.80269019 |
| H | 0.03716421  | 0.02260805  | -4.53067577 |
| C | -0.63461199 | -3.72657161 | -4.17023881 |
| H | 0.40581539  | -3.88966033 | -3.87326924 |
| H | -1.28238895 | -4.44910750 | -3.66852959 |
| H | -0.72370682 | -3.88454246 | -5.24952940 |

## D

$$G_{\text{solv}} = -2149.446244$$

|    |             |             |             |
|----|-------------|-------------|-------------|
| Ni | -0.32178720 | -2.45310401 | 0.09785505  |
| C  | 2.00965836  | 0.93766467  | -0.70546117 |
| C  | 1.59261466  | -0.34919343 | -0.34526613 |
| C  | -2.07543845 | -0.18932159 | -0.84583186 |
| C  | 0.23834445  | -0.72607002 | -0.39219914 |
| C  | -0.67575885 | 0.24973979  | -0.82698280 |
| C  | -0.25821230 | 1.53304033  | -1.20047454 |
| C  | 2.50565308  | -1.40519059 | 0.10661351  |
| S  | 1.80548090  | -2.91447080 | 0.49938023  |
| S  | -2.38661715 | -1.79755078 | -0.35630275 |
| H  | 3.05666294  | 1.22703412  | -0.65619695 |
| H  | -0.96828100 | 2.28303518  | -1.53948881 |
| N  | 3.80365249  | -1.21051450 | 0.20732802  |
| Cl | -0.99397612 | -4.52764949 | 0.68552085  |
| N  | -3.05486347 | 0.60933847  | -1.21388922 |
| C  | 1.61442273  | 4.17857454  | -0.18852357 |
| C  | 1.53091437  | 3.29803100  | -1.45466476 |
| H  | 2.51467989  | 3.27932152  | -1.93442426 |
| H  | 0.82895570  | 3.75318814  | -2.16078773 |
| C  | 0.31565183  | 4.26163561  | 0.55403056  |
| N  | 0.13026923  | 3.66228724  | 1.78686437  |
| C  | -0.85662951 | 4.84710095  | 0.14754064  |
| C  | -1.13169152 | 3.88845914  | 2.10632248  |
| N  | -1.76625707 | 4.59956492  | 1.14840896  |
| H  | -1.11924065 | 5.39808627  | -0.74250247 |
| H  | -1.62484171 | 3.56595099  | 3.01136971  |
| H  | 2.37557881  | 3.77172985  | 0.48510123  |
| H  | 1.94766342  | 5.17792500  | -0.48767755 |
| H  | -2.73303047 | 4.89323085  | 1.16908573  |
| H  | 4.41923492  | -1.95146989 | 0.51964309  |
| H  | 4.23202861  | -0.32298392 | -0.02529241 |
| H  | -4.01453917 | 0.28615855  | -1.21591916 |
| H  | -2.88939523 | 1.56539385  | -1.50204359 |
| C  | 1.08892636  | 1.89185719  | -1.13925108 |

TS<sub>1D,2D</sub>

G<sub>solv</sub> = -2492.415415

|    |             |             |             |
|----|-------------|-------------|-------------|
| Ni | -0.49757478 | -2.44803638 | 0.28969511  |
| C  | -0.64276862 | 0.73260070  | -2.45680651 |
| C  | -0.37959232 | -0.51218898 | -1.87500291 |
| C  | -1.51864036 | 0.08356573  | 1.62533463  |
| C  | -0.43937378 | -0.68951220 | -0.42504796 |
| C  | -1.17024068 | 0.37517768  | 0.26693913  |
| C  | -1.46039596 | 1.57678781  | -0.36866604 |
| C  | -0.02513673 | -1.68348043 | -2.61255998 |
| S  | 0.00494798  | -3.16916291 | -1.74067718 |
| S  | -1.33876778 | -1.54946049 | 2.13116493  |
| H  | -0.50241709 | 0.87855354  | -3.52674363 |
| H  | -1.97497975 | 2.37135411  | 0.17027503  |
| N  | 0.26471148  | -1.67135679 | -3.91591893 |
| C  | 0.00185293  | 4.04186833  | -1.94757433 |
| C  | -1.24002796 | 3.18628137  | -2.30423131 |
| H  | -1.31268602 | 3.13053159  | -3.39502948 |
| H  | -2.13358936 | 3.70386568  | -1.93709590 |
| C  | 0.12880616  | 4.26559666  | -0.47600316 |
| N  | 0.79048292  | 3.40126619  | 0.37974246  |
| C  | -0.43792425 | 5.22490258  | 0.31101331  |
| C  | 0.62000887  | 3.80457730  | 1.63239953  |
| N  | -0.11604501 | 4.91516952  | 1.61479260  |
| H  | -1.03951511 | 6.08245046  | 0.05677357  |
| H  | 1.01062703  | 3.31908732  | 2.51114702  |
| H  | 0.90525193  | 3.55117529  | -2.32301702 |
| H  | -0.07767709 | 5.01569951  | -2.43874844 |
| H  | -0.38397289 | 5.44314960  | 2.43600578  |
| C  | 2.07768674  | 0.04076652  | 0.06476788  |
| H  | 0.77651182  | -0.57157059 | -0.02211408 |
| C  | 2.08589800  | -0.00979161 | 1.61383704  |
| O  | 1.65596285  | 1.01352130  | 2.21006330  |
| O  | 2.52492134  | -1.05693544 | 2.16544639  |
| H  | 0.48951725  | -2.52741722 | -4.40237343 |
| H  | 0.31516955  | -0.80838750 | -4.43917377 |
| C  | 2.84663781  | -1.03454535 | -0.67200325 |
| H  | 2.70003760  | -2.02400513 | -0.23938262 |
| H  | 2.53794737  | -1.04747743 | -1.72176500 |
| H  | 3.91424510  | -0.78430124 | -0.63680562 |
| O  | 2.02904480  | 1.20116605  | -0.49102391 |
| H  | 1.27981759  | 2.49750032  | 0.11040807  |
| Cl | -0.32067511 | -4.52984113 | 1.22459459  |
| C  | -1.14237238 | 1.80384688  | -1.71596056 |

|   |             |            |            |
|---|-------------|------------|------------|
| N | -1.96374265 | 1.00742191 | 2.47859106 |
| H | -2.18108243 | 0.76075563 | 3.43392931 |
| H | -1.93230180 | 1.99108926 | 2.24738551 |

### E

$G_{\text{solv}} = -2122.909062$

|    |             |             |             |
|----|-------------|-------------|-------------|
| Pd | 2.17892770  | -0.26605645 | 0.04286300  |
| C  | -1.27920849 | 2.05037709  | -0.70008896 |
| C  | 0.00663782  | 1.67179894  | -0.36693968 |
| C  | -0.18843667 | -2.02646650 | -0.91675684 |
| C  | 0.38700407  | 0.31215346  | -0.43568252 |
| C  | -0.59238346 | -0.60851187 | -0.86715240 |
| C  | -1.85873244 | -0.16886988 | -1.20209221 |
| C  | 1.04186562  | 2.62121781  | 0.08686817  |
| S  | 2.57689906  | 1.98258049  | 0.47292736  |
| S  | 1.41717001  | -2.40057765 | -0.47567018 |
| H  | -1.65069838 | 3.06729402  | -0.65731009 |
| H  | -2.65592172 | -0.81512505 | -1.54960699 |
| N  | 0.80330267  | 3.90761843  | 0.19779240  |
| Cl | 4.38945907  | -0.97985014 | 0.63438381  |
| N  | -1.02161061 | -2.97421071 | -1.27922216 |
| C  | -4.32971496 | 1.49807395  | 0.04742892  |
| C  | -3.59111268 | 1.54642163  | -1.29789612 |
| H  | -3.59484535 | 2.55102089  | -1.72011981 |
| H  | -4.03476313 | 0.85923142  | -2.01822443 |
| N  | -2.17739253 | 1.13825592  | -1.12039960 |
| C  | -4.15259963 | 0.18604775  | 0.74365800  |
| N  | -3.18801454 | 0.00282674  | 1.71838430  |
| C  | -4.77062621 | -1.00785964 | 0.47342180  |
| C  | -3.23078062 | -1.28195827 | 2.01869829  |
| N  | -4.17225124 | -1.92990830 | 1.29540569  |
| H  | -5.55443253 | -1.27435381 | -0.21889118 |
| H  | -2.61430230 | -1.78349010 | 2.75014421  |
| H  | -3.96712029 | 2.30644476  | 0.68897538  |
| H  | -5.38465034 | 1.69002631  | -0.16733996 |
| H  | -4.39471439 | -2.91420131 | 1.35370868  |
| H  | 1.52964022  | 4.54115077  | 0.51301151  |
| H  | -0.09335197 | 4.32453299  | -0.02109004 |
| H  | -0.71916396 | -3.94171601 | -1.30503914 |
| H  | -1.98196972 | -2.79343274 | -1.54507874 |

### TS<sub>1E,2E</sub>

$G_{\text{solv}} = -2465.902409$

|    |            |             |            |
|----|------------|-------------|------------|
| Pd | 0.24874954 | -2.34558948 | 0.52032513 |
|----|------------|-------------|------------|

|    |             |             |             |
|----|-------------|-------------|-------------|
| C  | -2.37015012 | 0.96477032  | 0.73963535  |
| C  | -1.85807653 | -0.26157795 | 0.42136553  |
| C  | 1.75307916  | 0.27442775  | 1.31666248  |
| C  | -0.43005035 | -0.49689423 | 0.47137523  |
| C  | 0.33713005  | 0.55116230  | 1.10672396  |
| C  | -0.25598230 | 1.73343125  | 1.45557704  |
| C  | -2.67556916 | -1.38591690 | -0.02682084 |
| S  | -1.93761084 | -2.92780470 | -0.06457169 |
| S  | 2.25683671  | -1.35651106 | 1.19682535  |
| H  | -3.42200482 | 1.21709613  | 0.66891113  |
| H  | 0.26811610  | 2.54579875  | 1.94740994  |
| N  | -3.93277831 | -1.23198280 | -0.39312150 |
| C  | -1.81283967 | 4.12320916  | 0.05687096  |
| C  | -2.10374651 | 3.32478216  | 1.33580714  |
| H  | -3.17914194 | 3.25426460  | 1.49808402  |
| H  | -1.64990848 | 3.79844813  | 2.20798968  |
| N  | -1.57593705 | 1.95312773  | 1.23431868  |
| C  | -0.37879174 | 4.51835513  | -0.08750048 |
| N  | 0.61107066  | 3.72061615  | -0.63698290 |
| C  | 0.23295905  | 5.66048484  | 0.34121127  |
| C  | 1.77577044  | 4.34675916  | -0.52794056 |
| N  | 1.57225457  | 5.52802194  | 0.05585454  |
| H  | -0.16969435 | 6.53886204  | 0.81916331  |
| H  | 2.72971403  | 3.96868232  | -0.86008042 |
| H  | -2.14656354 | 3.55317306  | -0.81558549 |
| H  | -2.41166942 | 5.03622609  | 0.10389227  |
| H  | 2.29424318  | 6.21102666  | 0.24967351  |
| C  | 0.29473286  | 0.38002976  | -1.91193077 |
| H  | -0.03824428 | -0.29578538 | -0.91421745 |
| C  | 1.02713068  | -0.76111457 | -2.67914404 |
| O  | 2.28166563  | -0.69054811 | -2.77272348 |
| O  | 0.30888407  | -1.68793616 | -3.14917816 |
| H  | -4.48466942 | -2.02779647 | -0.68879104 |
| H  | -4.37891440 | -0.32416125 | -0.43028738 |
| C  | -1.05738843 | 0.76196839  | -2.50073881 |
| H  | -1.72768056 | -0.09723035 | -2.58507970 |
| H  | -1.53324235 | 1.52357448  | -1.87505100 |
| H  | -0.90978985 | 1.18602579  | -3.50052590 |
| O  | 1.05454460  | 1.37293984  | -1.50006434 |
| H  | 0.58437678  | 2.69635594  | -1.02729428 |
| N  | 2.61746600  | 1.23431313  | 1.58486698  |
| H  | 3.59629695  | 1.01971701  | 1.72857233  |
| H  | 2.36167815  | 2.21328817  | 1.54021131  |
| Cl | 1.09367502  | -4.60935143 | 0.54566159  |

**A1** $G_{\text{solv}} = -2322.984061$ 

|    |             |             |             |
|----|-------------|-------------|-------------|
| Ni | 2.19566496  | -1.06541651 | 0.13735866  |
| C  | -0.34212551 | 2.10395459  | -0.67013616 |
| C  | 0.78722457  | 1.37518882  | -0.34523892 |
| C  | -0.50057547 | -2.12097584 | -0.62979368 |
| C  | 0.72380165  | -0.03565137 | -0.31787085 |
| C  | -0.50124255 | -0.64057787 | -0.66137520 |
| C  | -1.55838998 | 0.13644277  | -1.09958663 |
| C  | 2.08787524  | 1.94538172  | 0.08395741  |
| S  | 3.16330200  | 0.79926653  | 0.79120779  |
| S  | 1.06644752  | -2.83101851 | -0.56763188 |
| H  | -0.41940573 | 3.18018822  | -0.61501718 |
| H  | -2.48501365 | -0.25482945 | -1.49591427 |
| N  | 2.44912620  | 3.20343245  | -0.06265291 |
| Cl | 3.98524666  | -2.30378751 | 0.68920696  |
| N  | -1.59069205 | -2.85873624 | -0.61543807 |
| C  | -3.45112779 | 2.65410497  | -0.15908788 |
| C  | -2.65488501 | 2.29583252  | -1.41524900 |
| H  | -2.30259246 | 3.19352824  | -1.92374815 |
| H  | -3.25793569 | 1.71350847  | -2.11205960 |
| N  | -1.46346897 | 1.47975350  | -1.08385794 |
| C  | -3.96700512 | 1.46692047  | 0.59366813  |
| N  | -3.38078043 | 1.01934433  | 1.76322722  |
| C  | -5.03650267 | 0.66772513  | 0.27732134  |
| C  | -4.09546940 | -0.02613588 | 2.13865633  |
| N  | -5.10926148 | -0.26966813 | 1.27727635  |
| H  | -5.73951863 | 0.69377743  | -0.54125124 |
| H  | -3.92404103 | -0.62874449 | 3.01831415  |
| H  | -2.82953640 | 3.26575336  | 0.50177364  |
| H  | -4.28304504 | 3.28042744  | -0.49490359 |
| H  | -5.78348636 | -1.01965626 | 1.34821300  |
| C  | 1.77428890  | 4.18250389  | -0.92334931 |
| H  | 1.28739228  | 3.68851581  | -1.76266078 |
| H  | 1.05972579  | 4.77646068  | -0.34833941 |
| H  | 2.54053348  | 4.84502606  | -1.32496917 |
| C  | 3.69293033  | 3.68527446  | 0.54731522  |
| H  | 3.80630003  | 3.27746108  | 1.55182984  |
| H  | 4.55304678  | 3.39937989  | -0.06563619 |
| H  | 3.63978950  | 4.77110350  | 0.61011546  |
| C  | -2.92928565 | -2.35748226 | -0.27652849 |
| H  | -2.85428875 | -1.45028810 | 0.31881306  |
| H  | -3.52518563 | -2.18886479 | -1.17636258 |
| H  | -3.41577868 | -3.11987984 | 0.33279983  |

|   |             |             |             |
|---|-------------|-------------|-------------|
| C | -1.50178717 | -4.31573888 | -0.74046966 |
| H | -0.76074959 | -4.58810750 | -1.49158816 |
| H | -1.23390974 | -4.76323039 | 0.22139018  |
| H | -2.47691396 | -4.68693255 | -1.05385241 |

**TS<sub>1A1,2A1</sub>**

G<sub>solv</sub> = -2665.982353

|    |             |             |             |
|----|-------------|-------------|-------------|
| Ni | -0.46501344 | -2.42428341 | 0.70941001  |
| C  | -1.26973856 | 0.51893353  | -2.04472072 |
| C  | -0.72553273 | -0.60794492 | -1.50123725 |
| C  | -0.96501952 | 0.20274482  | 2.16522581  |
| C  | -0.53025945 | -0.71311677 | -0.06876998 |
| C  | -1.01934409 | 0.40364541  | 0.71068120  |
| C  | -1.55669944 | 1.50034297  | 0.08910564  |
| C  | -0.38286059 | -1.81490129 | -2.26572991 |
| S  | -0.31874991 | -3.25566860 | -1.32622917 |
| S  | -0.80849549 | -1.44523900 | 2.64691771  |
| H  | -1.48638989 | 0.64344685  | -3.09732706 |
| H  | -1.97817075 | 2.34934356  | 0.61000903  |
| N  | -0.12445658 | -1.83471765 | -3.56268355 |
| C  | -0.73321528 | 3.60108653  | -2.32741712 |
| C  | -1.99733004 | 2.83237094  | -1.92248302 |
| H  | -2.58337664 | 2.59664391  | -2.81179620 |
| H  | -2.61788227 | 3.41901342  | -1.24398236 |
| N  | -1.66032506 | 1.56255314  | -1.26097644 |
| C  | -0.01273334 | 4.26363285  | -1.19884643 |
| N  | 0.85683537  | 3.63687667  | -0.32023276 |
| C  | -0.06171049 | 5.57560839  | -0.82684955 |
| C  | 1.30160325  | 4.53161689  | 0.55434411  |
| N  | 0.76265754  | 5.71453162  | 0.26615846  |
| H  | -0.60097243 | 6.40733956  | -1.25041014 |
| H  | 1.98369085  | 4.33349208  | 1.36593200  |
| H  | -0.05712076 | 2.93306281  | -2.87128401 |
| H  | -1.04074103 | 4.38533392  | -3.02379331 |
| H  | 0.95166153  | 6.57298492  | 0.76886543  |
| C  | 1.92899495  | 0.19708782  | 0.09096536  |
| H  | 0.89868929  | -0.51332076 | 0.07269739  |
| C  | 2.77723342  | -0.73754377 | 1.00117658  |
| O  | 3.00613405  | -0.35554909 | 2.18089147  |
| O  | 3.16884043  | -1.82959197 | 0.49837132  |
| C  | 2.34205539  | 0.19941021  | -1.37448782 |
| H  | 2.32908859  | -0.79899996 | -1.81880949 |
| H  | 1.66295142  | 0.84907446  | -1.93541437 |
| H  | 3.35532739  | 0.60695226  | -1.46595325 |



|    |             |             |             |
|----|-------------|-------------|-------------|
| O  | 1.62589379  | 1.37467091  | 0.59721385  |
| H  | 1.11942843  | 2.59366693  | -0.17027934 |
| N  | -1.01895872 | 1.16338411  | 3.07309259  |
| Cl | -0.28584614 | -4.46470645 | 1.66066065  |
| C  | 0.21191068  | -0.65619584 | -4.36894537 |
| H  | -0.64543433 | -0.32964985 | -4.96300052 |
| H  | 0.56800936  | 0.15735646  | -3.74096782 |
| H  | 1.01877595  | -0.94327639 | -5.04459608 |
| C  | 0.04541324  | -3.10698279 | -4.26586660 |
| H  | 1.05913227  | -3.49355012 | -4.12015819 |
| H  | -0.67847114 | -3.83914454 | -3.90829890 |
| H  | -0.12511882 | -2.93258694 | -5.32803172 |
| C  | -0.84496060 | 2.59033853  | 2.78928410  |
| H  | -0.26558759 | 2.72452084  | 1.88040025  |
| H  | -1.81108672 | 3.09582993  | 2.70919970  |
| H  | -0.28389076 | 3.02725594  | 3.61594127  |
| C  | -1.10488926 | 0.83084223  | 4.49717597  |
| H  | -1.80513351 | 0.01016257  | 4.65560786  |
| H  | -0.12077303 | 0.54922451  | 4.88482025  |
| H  | -1.46563756 | 1.70980201  | 5.02995021  |

## A2

$G_{\text{solv}} = -1805.537126$

|    |             |             |             |
|----|-------------|-------------|-------------|
| Ni | 0.54384700  | 2.49059543  | 0.15229765  |
| C  | -2.03296071 | -0.64286681 | -0.70978086 |
| C  | -1.53850230 | 0.58925751  | -0.32920166 |
| C  | 2.11937333  | 0.10697519  | -0.81325397 |
| C  | -0.15434629 | 0.85059003  | -0.36500056 |
| C  | 0.67509128  | -0.19439818 | -0.81171932 |
| C  | 0.13691955  | -1.40593949 | -1.19851882 |
| C  | -2.37166989 | 1.71189766  | 0.14607839  |
| S  | -1.53810391 | 3.13841836  | 0.56067764  |
| S  | 2.55693159  | 1.67197010  | -0.30469850 |
| H  | -3.08044949 | -0.92103030 | -0.69426565 |
| H  | 0.71771925  | -2.24507232 | -1.56304103 |
| N  | -3.67684817 | 1.61936394  | 0.24787567  |
| N  | 3.01454676  | -0.78050765 | -1.17862402 |
| C  | -1.77295587 | -3.76475622 | -0.08067479 |
| C  | -1.72839694 | -2.96711436 | -1.39185145 |
| H  | -2.72138408 | -2.86140156 | -1.82821852 |
| H  | -1.07181572 | -3.44193005 | -2.12091960 |
| N  | -1.19645695 | -1.60591285 | -1.14854919 |
| C  | -0.46146524 | -3.74639872 | 0.63847581  |
| N  | -0.20208968 | -2.85002704 | 1.65990844  |

|   |             |             |             |
|---|-------------|-------------|-------------|
| C | 0.67177087  | -4.46364295 | 0.35273941  |
| C | 1.06794405  | -3.03009388 | 1.97194559  |
| N | 1.63411684  | -3.99512718 | 1.21206054  |
| H | 0.87291108  | -5.23660873 | -0.37304627 |
| H | 1.61469823  | -2.49948227 | 2.73750284  |
| H | -2.55324050 | -3.35438967 | 0.56683071  |
| H | -2.06163533 | -4.78596534 | -0.34478030 |
| H | 2.59154303  | -4.31384289 | 1.27089455  |
| H | -4.22576455 | 2.40498470  | 0.57836738  |
| H | -4.18776736 | 0.77779324  | 0.01047191  |
| H | 4.00201189  | -0.55137066 | -1.16892224 |
| H | 2.76544507  | -1.71530859 | -1.47910944 |
| F | 1.23678631  | 4.11835042  | 0.67156760  |

**TS<sub>1A2,2A2</sub>**

G<sub>solv</sub> = -2148.532304

|    |             |             |             |
|----|-------------|-------------|-------------|
| Ni | -0.65754030 | -2.58587778 | 0.38743049  |
| C  | -0.62666040 | 0.50113911  | -2.37811538 |
| C  | -0.38764053 | -0.70070305 | -1.77649254 |
| C  | -1.56672267 | -0.00165766 | 1.70284581  |
| C  | -0.54502574 | -0.86222623 | -0.34557653 |
| C  | -1.21593153 | 0.23968491  | 0.30829139  |
| C  | -1.46818277 | 1.40590298  | -0.36074001 |
| C  | 0.06237765  | -1.89809093 | -2.48056089 |
| S  | 0.00666157  | -3.35467307 | -1.59387726 |
| S  | -1.46462215 | -1.62487736 | 2.22547524  |
| H  | -0.48239867 | 0.69501997  | -3.43512866 |
| H  | -1.96731909 | 2.26239462  | 0.07944022  |
| N  | 0.49369927  | -1.86603418 | -3.72647397 |
| C  | 0.14680338  | 3.64710646  | -1.98220968 |
| C  | -1.15330486 | 2.88741013  | -2.28034547 |
| H  | -1.27263482 | 2.75941306  | -3.35632979 |
| H  | -2.02149234 | 3.42613006  | -1.89660368 |
| N  | -1.13812116 | 1.54843798  | -1.67053492 |
| C  | 0.24304975  | 4.14367366  | -0.57653575 |
| N  | 0.67440966  | 3.39183613  | 0.50376076  |
| C  | -0.11785288 | 5.36369517  | -0.08320722 |
| C  | 0.56583569  | 4.12238640  | 1.60610524  |
| N  | 0.09159475  | 5.32348742  | 1.27602014  |
| H  | -0.49945348 | 6.24011575  | -0.58151867 |
| H  | 0.82139790  | 3.80261856  | 2.60387700  |
| H  | 1.00551260  | 3.01458060  | -2.22805522 |
| H  | 0.17530012  | 4.51463116  | -2.64637117 |
| H  | -0.07461842 | 6.08016517  | 1.92813532  |

|   |             |             |             |
|---|-------------|-------------|-------------|
| C | 1.78858407  | -0.02620901 | 0.52126505  |
| H | 0.77620536  | -0.70216968 | 0.14803030  |
| C | 2.45205858  | -1.14151241 | 1.38517931  |
| O | 2.44999324  | -0.98911928 | 2.63588049  |
| O | 2.94973024  | -2.12547186 | 0.76927798  |
| H | 0.79078387  | -2.71453767 | -4.19190268 |
| H | 0.57596019  | -1.00225870 | -4.24719171 |
| C | 2.48954424  | 0.23753157  | -0.80463634 |
| H | 2.58269646  | -0.66727477 | -1.41070860 |
| H | 1.93710979  | 0.99137505  | -1.37400889 |
| H | 3.49500654  | 0.62713666  | -0.60828432 |
| O | 1.35945482  | 1.02663129  | 1.17656839  |
| H | 0.99185231  | 2.35089022  | 0.57547710  |
| N | -1.93666518 | 0.96327404  | 2.52415487  |
| H | -2.16663917 | 0.75646359  | 3.48814809  |
| H | -1.89359706 | 1.94023506  | 2.26168266  |
| F | -0.71162380 | -4.29218462 | 1.13375406  |

### A3

$G_{\text{solv}} = -1706.248229$

|    |             |             |             |
|----|-------------|-------------|-------------|
| Ni | -0.78285925 | -2.63180462 | 0.25999726  |
| C  | 2.00217311  | 0.31663336  | -0.72135313 |
| C  | 1.42871837  | -0.86973402 | -0.30898204 |
| C  | -2.19271601 | -0.16900899 | -0.74270920 |
| C  | 0.03150534  | -1.03289902 | -0.31942257 |
| C  | -0.73349790 | 0.05287921  | -0.77622902 |
| C  | -0.12410446 | 1.21702660  | -1.19828818 |
| C  | 2.17183158  | -2.04975118 | 0.18032537  |
| S  | 1.22984015  | -3.40007540 | 0.65451403  |
| S  | -2.71661654 | -1.70203132 | -0.18826601 |
| H  | 3.06592441  | 0.52627338  | -0.72427914 |
| H  | -0.65165633 | 2.08671154  | -1.57269432 |
| N  | 3.48225289  | -2.06797962 | 0.25205408  |
| N  | -3.04262248 | 0.76103401  | -1.11091094 |
| C  | 1.96172122  | 3.46490792  | -0.16178050 |
| C  | 1.84118664  | 2.64090750  | -1.45165346 |
| H  | 2.81780256  | 2.45938808  | -1.90008379 |
| H  | 1.20728299  | 3.14356070  | -2.18226032 |
| N  | 1.22270272  | 1.32514712  | -1.17006941 |
| C  | 0.66400782  | 3.55512937  | 0.57678918  |
| N  | 0.36131470  | 2.70698568  | 1.62700506  |
| C  | -0.42256694 | 4.33989853  | 0.28735190  |
| C  | -0.88832673 | 2.98163202  | 1.95222482  |
| N  | -1.40027010 | 3.96192769  | 1.17366605  |

|   |             |             |             |
|---|-------------|-------------|-------------|
| H | -0.58296891 | 5.10448950  | -0.45722018 |
| H | -1.45699748 | 2.51086338  | 2.74060922  |
| H | 2.72208769  | 3.01727761  | 0.48476119  |
| H | 2.31588455  | 4.45722588  | -0.45498624 |
| H | -2.33270924 | 4.34681918  | 1.23759897  |
| H | 3.96943703  | -2.88977800 | 0.59097963  |
| H | 4.05624305  | -1.28010916 | -0.02258965 |
| H | -4.04135268 | 0.59111008  | -1.07734860 |
| H | -2.74290528 | 1.67264350  | -1.43598433 |
| H | -1.44082740 | -3.91777081 | 0.73375303  |

**TS<sub>1A3,2A3</sub>**

G<sub>solv</sub> = -2049.241070

|    |             |             |             |
|----|-------------|-------------|-------------|
| Ni | -0.79296076 | -2.66687698 | 0.61176281  |
| C  | -0.57315695 | 0.21993528  | -2.39061160 |
| C  | -0.39911112 | -0.94455434 | -1.69837274 |
| C  | -1.58080539 | 0.04880004  | 1.70377723  |
| C  | -0.56392382 | -0.98481518 | -0.25966997 |
| C  | -1.19735247 | 0.18661572  | 0.30442707  |
| C  | -1.40053620 | 1.30630920  | -0.45085060 |
| C  | -0.03216956 | -2.22746991 | -2.29151836 |
| S  | -0.17575466 | -3.60264880 | -1.27462172 |
| S  | -1.57352967 | -1.54872681 | 2.33279380  |
| H  | -0.41672169 | 0.33343809  | -3.45771204 |
| H  | -1.88412065 | 2.20701441  | -0.08758619 |
| N  | 0.39073206  | -2.34405572 | -3.53611474 |
| C  | 0.31040160  | 3.39693510  | -2.11412918 |
| C  | -0.98080328 | 2.63781520  | -2.45363987 |
| H  | -1.02948217 | 2.44691540  | -3.52579471 |
| H  | -1.86006674 | 3.21680677  | -2.16447883 |
| N  | -1.03831059 | 1.34030717  | -1.76290126 |
| C  | 0.33420546  | 3.94008607  | -0.72174872 |
| N  | 0.73919407  | 3.23268133  | 0.39811417  |
| C  | -0.09122493 | 5.15896670  | -0.27943077 |
| C  | 0.54707223  | 3.98456404  | 1.47416155  |
| N  | 0.05137619  | 5.16067776  | 1.08911842  |
| H  | -0.47890543 | 6.00817973  | -0.81854744 |
| H  | 0.76150499  | 3.69794224  | 2.49158002  |
| H  | 1.17481633  | 2.75040677  | -2.29180230 |
| H  | 0.38090153  | 4.23999767  | -2.80620713 |
| H  | -0.17510852 | 5.92617843  | 1.71200400  |
| C  | 1.78879934  | -0.18868294 | 0.55658976  |
| H  | 0.73735388  | -0.85342258 | 0.22217264  |
| C  | 2.41999185  | -1.29857304 | 1.44913567  |

|   |             |             |             |
|---|-------------|-------------|-------------|
| O | 2.38235506  | -1.13295931 | 2.69773127  |
| O | 2.93013709  | -2.29143821 | 0.85739367  |
| H | 0.62141263  | -3.25267185 | -3.91845739 |
| H | 0.52372565  | -1.54315121 | -4.13981147 |
| C | 2.47863755  | 0.00599093  | -0.78530425 |
| H | 2.52408159  | -0.91746545 | -1.36770984 |
| H | 1.94957559  | 0.76719032  | -1.36602144 |
| H | 3.50307110  | 0.35644933  | -0.61460798 |
| O | 1.40367255  | 0.89807933  | 1.18101535  |
| H | 1.06108978  | 2.19647093  | 0.51882356  |
| N | -1.91064081 | 1.08186999  | 2.45768807  |
| H | -2.16454446 | 0.94856052  | 3.42845470  |
| H | -1.81350364 | 2.03650982  | 2.13327494  |
| H | -0.93954885 | -4.01213958 | 1.32496879  |

#### A4

$$G_{\text{solv}} = -2244.452391$$

|    |             |             |             |
|----|-------------|-------------|-------------|
| Ni | 1.82743710  | -0.00034591 | 1.12321310  |
| C  | -0.82906755 | -0.63162256 | -1.97782328 |
| C  | 0.36306709  | -0.46742695 | -1.29546339 |
| C  | -0.71825759 | -1.21013750 | 2.18990817  |
| C  | 0.38602572  | -0.59210607 | 0.10903484  |
| C  | -0.78119238 | -1.08149913 | 0.72391686  |
| C  | -1.92150505 | -1.32441692 | -0.01562660 |
| C  | 1.62589626  | 0.01816657  | -1.89713549 |
| S  | 2.74267919  | 0.67721334  | -0.76323835 |
| S  | 0.73648115  | -0.70734936 | 2.91856592  |
| H  | -0.97299272 | -0.38855956 | -3.02252570 |
| H  | -2.85425778 | -1.69244092 | 0.39303967  |
| N  | 1.91448791  | -0.05198151 | -3.17864207 |
| Cl | 3.55067549  | 0.74856039  | 2.34242047  |
| N  | -1.72745869 | -1.67186770 | 2.89112683  |
| C  | -3.74756847 | 0.49843844  | -1.95364778 |
| C  | -3.24421072 | -0.95557948 | -2.02343767 |
| H  | -3.11437680 | -1.28709108 | -3.05375880 |
| H  | -3.92739045 | -1.63570992 | -1.51531340 |
| N  | -1.93611039 | -1.05990979 | -1.33731160 |
| C  | -3.59792383 | 1.07829752  | -0.58221972 |
| N  | -2.50140570 | 1.85161649  | -0.24705264 |
| C  | -4.35387549 | 0.83710223  | 0.53738110  |
| C  | -2.59956074 | 2.05876776  | 1.05270078  |
| N  | -3.70472026 | 1.47230887  | 1.56700125  |
| H  | -5.26264335 | 0.27470717  | 0.68715967  |
| H  | -1.91250321 | 2.63185128  | 1.65804997  |

|   |             |             |             |
|---|-------------|-------------|-------------|
| H | -3.18404218 | 1.10920434  | -2.66468480 |
| H | -4.79293514 | 0.48952735  | -2.27365302 |
| H | -3.99565389 | 1.50170766  | 2.53474784  |
| C | 1.20146716  | -0.88147201 | -4.15727400 |
| H | 0.68755494  | -1.70731471 | -3.66944126 |
| H | 0.50138502  | -0.27778530 | -4.73966512 |
| H | 1.94945343  | -1.30178641 | -4.83014800 |
| C | 3.11657612  | 0.60073549  | -3.70332823 |
| H | 3.25113234  | 1.57784968  | -3.23951003 |
| H | 3.99717000  | -0.02133568 | -3.51709123 |
| H | 2.98695411  | 0.73245307  | -4.77693245 |
| H | -1.66786811 | -1.73794835 | 3.90105326  |
| H | -2.59804683 | -1.96564227 | 2.46455172  |

**TS<sub>1A4,2A4</sub>**

G<sub>solv</sub> = -2587.446919

|    |             |             |             |
|----|-------------|-------------|-------------|
| Ni | -0.64882464 | -2.21157133 | 0.89851118  |
| C  | -1.03523732 | 0.62205826  | -2.08933827 |
| C  | -0.64287740 | -0.51635471 | -1.44554728 |
| C  | -1.19429045 | 0.50907020  | 2.11731843  |
| C  | -0.59347379 | -0.56126551 | 0.00115123  |
| C  | -1.12615765 | 0.60368268  | 0.66609283  |
| C  | -1.51807467 | 1.70542987  | -0.04277408 |
| C  | -0.30019714 | -1.78547296 | -2.09981349 |
| S  | -0.45075545 | -3.16794571 | -1.08046942 |
| S  | -1.00685297 | -1.05870121 | 2.76692731  |
| H  | -1.10902067 | 0.71831186  | -3.16414670 |
| H  | -1.93400404 | 2.59971304  | 0.40960066  |
| N  | 0.11646577  | -1.89718374 | -3.34830203 |
| C  | -0.21781856 | 3.77455284  | -2.04566379 |
| C  | -1.55002065 | 3.01140981  | -2.10131087 |
| H  | -1.81893557 | 2.80189042  | -3.13671356 |
| H  | -2.35480932 | 3.58837039  | -1.64242156 |
| N  | -1.44383010 | 1.72490568  | -1.39508711 |
| C  | 0.09258708  | 4.33819324  | -0.69566918 |
| N  | 0.71875238  | 3.64892002  | 0.33095687  |
| C  | -0.23186015 | 5.56708440  | -0.19821386 |
| C  | 0.75493203  | 4.42323267  | 1.40757068  |
| N  | 0.18993237  | 5.59336753  | 1.11107102  |
| H  | -0.72166541 | 6.40778814  | -0.66231391 |
| H  | 1.17778943  | 4.15543231  | 2.36271747  |
| H  | 0.59142288  | 3.12127522  | -2.38668918 |
| H  | -0.29065168 | 4.60719016  | -2.74992344 |
| H  | 0.10255357  | 6.37194672  | 1.75267259  |

|    |             |             |             |
|----|-------------|-------------|-------------|
| C  | 1.86530524  | 0.25389923  | 0.42259204  |
| H  | 0.80757428  | -0.41287148 | 0.27139005  |
| C  | 2.64924145  | -0.82624487 | 1.22337045  |
| O  | 2.92904964  | -0.57827626 | 2.42651041  |
| O  | 2.94812409  | -1.88924641 | 0.60827025  |
| C  | 2.34348337  | 0.43174807  | -1.01216246 |
| H  | 2.34440824  | -0.50757005 | -1.57067830 |
| H  | 1.69921860  | 1.15283696  | -1.52594492 |
| H  | 3.36373230  | 0.83204079  | -1.00404206 |
| O  | 1.56893172  | 1.36011428  | 1.07079563  |
| H  | 1.07276414  | 2.61908546  | 0.41552242  |
| N  | -1.38322138 | 1.56581488  | 2.88550394  |
| Cl | -0.60149719 | -4.18908042 | 1.97977144  |
| C  | 0.62548489  | -0.78279386 | -4.15589100 |
| H  | -0.13054889 | -0.43408153 | -4.86406028 |
| H  | 0.95527826  | 0.03662216  | -3.52049935 |
| H  | 1.48772946  | -1.15094432 | -4.71344697 |
| C  | 0.29568527  | -3.21564081 | -3.95816593 |
| H  | 1.25459650  | -3.64853941 | -3.65625712 |
| H  | -0.51464377 | -3.88390328 | -3.66706876 |
| H  | 0.27956983  | -3.09340964 | -5.04093006 |
| H  | -1.42445409 | 1.47071217  | 3.89230943  |
| H  | -1.37943341 | 2.50578419  | 2.50828807  |

#### A5

$G_{\text{solv}} = -2706.286050$

|    |             |             |             |
|----|-------------|-------------|-------------|
| Ni | 0.14911358  | 0.14415180  | 1.80494180  |
| C  | 1.12782092  | -1.66378006 | -1.79983692 |
| C  | 1.19450435  | -1.18047213 | -0.50804205 |
| C  | -2.19397023 | 0.30447163  | -0.09125484 |
| C  | 0.08716927  | -0.53161839 | 0.07261454  |
| C  | -1.06889836 | -0.41708621 | -0.72044866 |
| C  | -1.09710663 | -0.93436150 | -2.00076231 |
| C  | 2.38960401  | -1.27168676 | 0.35680412  |
| S  | 2.23217259  | -0.58320484 | 1.90926567  |
| S  | -1.93850719 | 0.81232488  | 1.51636690  |
| H  | 1.94098006  | -2.15523025 | -2.32075613 |
| H  | -1.95441933 | -0.89445488 | -2.66145921 |
| N  | 3.49522382  | -1.85134390 | -0.05214087 |
| Cl | 0.22597721  | 0.96194624  | 3.88711577  |
| N  | -3.30428919 | 0.55437209  | -0.74683327 |
| C  | 0.52157168  | -0.72031907 | -4.78320028 |
| C  | -0.00010667 | -1.90157761 | -3.95079201 |
| H  | 0.62956687  | -2.78277939 | -4.07118542 |

|   |             |             |             |
|---|-------------|-------------|-------------|
| H | -1.02311626 | -2.15828456 | -4.22575850 |
| N | -0.01055996 | -1.54745498 | -2.51246818 |
| C | -0.19076690 | 0.55619703  | -4.46453622 |
| N | 0.32815737  | 1.47475839  | -3.56948484 |
| C | -1.44326684 | 0.95145566  | -4.85933874 |
| C | -0.60537342 | 2.39782977  | -3.43087371 |
| N | -1.68973600 | 2.12542652  | -4.19207125 |
| H | -2.16354773 | 0.50554542  | -5.52798716 |
| H | -0.54071017 | 3.27696685  | -2.80675737 |
| H | 1.59333525  | -0.59681567 | -4.60261414 |
| H | 0.38938910  | -0.99348303 | -5.83380976 |
| H | -2.52723664 | 2.68754621  | -4.25795500 |
| H | -3.41449582 | 0.20202495  | -1.69074758 |
| H | 3.54943182  | -2.20673043 | -0.99973269 |
| C | 4.73952281  | -1.91603526 | 0.71562304  |
| H | 4.51033236  | -2.25348266 | 1.72953093  |
| H | 5.34718249  | -2.68647105 | 0.23790972  |
| C | 5.48124804  | -0.59586109 | 0.74746349  |
| C | 5.96064352  | -0.09310168 | 1.95799193  |
| C | 5.71844481  | 0.11672212  | -0.43202706 |
| C | 6.67195860  | 1.10658813  | 1.99237430  |
| H | 5.77076629  | -0.63860243 | 2.87864796  |
| C | 6.42082045  | 1.31961440  | -0.39787447 |
| H | 5.35519625  | -0.26798386 | -1.38156535 |
| C | 6.90051517  | 1.81711488  | 0.81491262  |
| H | 7.03776490  | 1.48898756  | 2.94049144  |
| H | 6.59754880  | 1.86686433  | -1.31889503 |
| H | 7.44856443  | 2.75399905  | 0.84088208  |
| C | -4.47220733 | 1.23807381  | -0.19056310 |
| H | -5.06689463 | 1.55976142  | -1.04742082 |
| H | -4.13509039 | 2.13431138  | 0.33666267  |
| C | -5.29429674 | 0.35595062  | 0.72542190  |
| C | -5.68523721 | 0.82328430  | 1.98111070  |
| C | -5.69517785 | -0.91894056 | 0.31382725  |
| C | -6.47001181 | 0.02901869  | 2.81759331  |
| H | -5.36949400 | 1.81014662  | 2.30881050  |
| C | -6.47122483 | -1.71677945 | 1.15186193  |
| H | -5.40045235 | -1.29206778 | -0.66365053 |
| C | -6.86159108 | -1.24394786 | 2.40591142  |
| H | -6.76710851 | 0.40255613  | 3.79283142  |
| H | -6.77506143 | -2.70635885 | 0.82420537  |
| H | -7.46696913 | -1.86604946 | 3.05809084  |



G<sub>solv</sub> = -3049.278611

|    |             |             |             |
|----|-------------|-------------|-------------|
| Ni | 1.98965727  | -0.27761699 | -0.32316355 |
| C  | -1.72706015 | -2.02757226 | -0.86556348 |
| C  | -0.50470343 | -1.48067143 | -1.13068033 |
| C  | 0.27646599  | 0.12703204  | 2.15419381  |
| C  | 0.14931181  | -0.61805116 | -0.17145359 |
| C  | -0.47386968 | -0.59481757 | 1.13181169  |
| C  | -1.66773795 | -1.22012428 | 1.35581687  |
| C  | 0.23029653  | -1.66022342 | -2.38185977 |
| S  | 1.86456147  | -1.16551541 | -2.35301186 |
| S  | 1.91436824  | 0.43835288  | 1.77784077  |
| H  | -2.28683375 | -2.63793074 | -1.56530968 |
| H  | -2.15508516 | -1.26300124 | 2.32422182  |
| N  | -0.34461671 | -2.16558233 | -3.45771979 |
| C  | -4.66490763 | -1.11670294 | 0.26583204  |
| C  | -3.71180629 | -2.28936193 | 0.53854987  |
| H  | -3.91391067 | -3.10411677 | -0.15658557 |
| H  | -3.83209940 | -2.66383544 | 1.55648417  |
| N  | -2.30794995 | -1.88666142 | 0.35916673  |
| C  | -4.62440361 | -0.06515203 | 1.32653109  |
| N  | -3.70872743 | 0.97216474  | 1.36614101  |
| C  | -5.37616438 | 0.03642044  | 2.46099933  |
| C  | -3.88453191 | 1.66128355  | 2.48609908  |
| N  | -4.89427772 | 1.11713000  | 3.16404791  |
| H  | -6.19667918 | -0.56393969 | 2.81928523  |
| H  | -3.31350001 | 2.52273736  | 2.79414931  |
| H  | -4.44066698 | -0.68377749 | -0.71391489 |
| H  | -5.67858356 | -1.52298761 | 0.22533301  |
| H  | -5.24889404 | 1.46345151  | 4.04723365  |
| C  | -0.89099757 | 1.70825046  | -0.83058162 |
| H  | -0.14661545 | 0.68831970  | -0.64947036 |
| C  | 0.25569040  | 2.73562720  | -1.08254883 |
| O  | 0.49788067  | 3.57378261  | -0.17304559 |
| O  | 0.86929876  | 2.65702244  | -2.18380203 |
| C  | -1.65839631 | 1.31210970  | -2.08392560 |
| H  | -0.99715570 | 0.95772417  | -2.87819143 |
| H  | -2.38566399 | 0.52991422  | -1.84559237 |
| H  | -2.20582919 | 2.18437415  | -2.45952083 |
| O  | -1.59926124 | 1.89654329  | 0.25716634  |
| H  | -2.88094039 | 1.21546113  | 0.71223905  |
| N  | -0.29068748 | 0.53274538  | 3.27522403  |
| Cl | 4.17353057  | 0.22873471  | -0.54892233 |
| H  | -1.28442802 | 0.37555640  | 3.39969483  |
| H  | -1.33988209 | -2.35364152 | -3.42767439 |

|   |             |             |             |
|---|-------------|-------------|-------------|
| C | 0.27519027  | -2.23898662 | -4.77855941 |
| H | -0.32728052 | -2.93900084 | -5.36069559 |
| H | 1.27598251  | -2.66566946 | -4.68079958 |
| C | 0.33481921  | -0.88936277 | -5.46579769 |
| C | 1.51690879  | -0.45998362 | -6.07101731 |
| C | -0.79519495 | -0.06702852 | -5.51413800 |
| C | 1.57236693  | 0.77549703  | -6.71660984 |
| H | 2.40141128  | -1.09008775 | -6.02704432 |
| C | -0.73895156 | 1.17145525  | -6.14963663 |
| H | -1.72248260 | -0.38858693 | -5.04668844 |
| C | 0.44569364  | 1.59575688  | -6.75348251 |
| H | 2.49917633  | 1.10072872  | -7.17942862 |
| H | -1.62024998 | 1.80540881  | -6.17341164 |
| H | 0.49002886  | 2.56175468  | -7.24724396 |
| C | 0.40627630  | 1.20107004  | 4.36531155  |
| H | -0.36786790 | 1.59843141  | 5.02513142  |
| H | 0.96175462  | 2.05374903  | 3.96289701  |
| C | 1.33921224  | 0.29535411  | 5.14434034  |
| C | 2.46141848  | 0.85126171  | 5.76340915  |
| C | 1.08666606  | -1.07073403 | 5.28928684  |
| C | 3.31637804  | 0.05550267  | 6.52434417  |
| H | 2.66998155  | 1.91130819  | 5.64258211  |
| C | 1.94497403  | -1.86914178 | 6.04491045  |
| H | 0.22349353  | -1.51885403 | 4.80438664  |
| C | 3.06082408  | -1.30862320 | 6.66638072  |
| H | 4.18663244  | 0.49990954  | 6.99801079  |
| H | 1.74136820  | -2.93088468 | 6.14718146  |
| H | 3.72938583  | -1.93099115 | 7.25339413  |

## A6

$$G_{\text{solv}} = -2436.102235$$

|    |             |             |             |
|----|-------------|-------------|-------------|
| Ni | 0.08325910  | -2.33197622 | -0.04389795 |
| C  | -0.67120997 | 1.43153538  | -1.62268597 |
| C  | -0.02720378 | 0.27840851  | -1.21836408 |
| C  | -2.88990784 | -1.80858376 | -0.08548476 |
| C  | -0.75883338 | -0.80414329 | -0.69204608 |
| C  | -2.15779950 | -0.66482359 | -0.65758724 |
| C  | -2.76300209 | 0.49335073  | -1.10482278 |
| C  | 1.43770348  | 0.08651625  | -1.24458909 |
| S  | 2.00376067  | -1.36798383 | -0.55567039 |
| S  | -1.93240251 | -3.12245439 | 0.42476708  |
| H  | -0.17414594 | 2.32548122  | -1.98386532 |
| H  | -3.83231654 | 0.66390089  | -1.11123153 |
| N  | 2.23821393  | 0.97903245  | -1.77967327 |

|    |             |             |             |
|----|-------------|-------------|-------------|
| Cl | 1.09935235  | -4.16610259 | 0.73616761  |
| N  | -4.19666810 | -1.81102945 | 0.03327557  |
| C  | -2.61264820 | 3.67687633  | -0.53499030 |
| C  | -2.66978387 | 2.82082313  | -1.80966004 |
| H  | -2.15774577 | 3.30480666  | -2.64140627 |
| H  | -3.69940186 | 2.61307773  | -2.09966550 |
| N  | -2.01636979 | 1.51384703  | -1.57118585 |
| C  | -3.08803975 | 2.92809528  | 0.67027189  |
| N  | -2.20072652 | 2.31752470  | 1.53861357  |
| C  | -4.37527889 | 2.61930535  | 1.03029618  |
| C  | -2.95048108 | 1.65417826  | 2.39893942  |
| N  | -4.26748433 | 1.80717300  | 2.13201694  |
| H  | -5.32878523 | 2.89160218  | 0.60446391  |
| H  | -2.59220937 | 1.06172377  | 3.22801065  |
| H  | -1.58466976 | 4.01303873  | -0.37152913 |
| H  | -3.22753937 | 4.56158708  | -0.72202310 |
| H  | -5.02980879 | 1.40359153  | 2.65934883  |
| H  | -4.77484791 | -1.03300486 | -0.26055917 |
| H  | 1.84090714  | 1.82652466  | -2.16836022 |
| C  | 3.70093268  | 0.92446061  | -1.74746151 |
| H  | 4.02427491  | -0.08086497 | -2.02782210 |
| H  | 4.04561932  | 1.61376023  | -2.51987861 |
| C  | 4.25873614  | 1.31568172  | -0.39520557 |
| C  | 5.17086708  | 0.48827728  | 0.26109219  |
| C  | 3.87574877  | 2.52213619  | 0.19995354  |
| C  | 5.69692709  | 0.86105696  | 1.49881628  |
| H  | 5.46628382  | -0.45368004 | -0.19319840 |
| C  | 4.39425668  | 2.89172727  | 1.43858964  |
| H  | 3.16838624  | 3.17422911  | -0.30656663 |
| C  | 5.30693309  | 2.06089622  | 2.09144153  |
| H  | 6.40389059  | 0.20865506  | 2.00225846  |
| H  | 4.08890060  | 3.82938749  | 1.89305325  |
| H  | 5.71051348  | 2.34847230  | 3.05751724  |
| H  | -4.67553722 | -2.60668206 | 0.43985163  |

**TS<sub>1A6,2A6</sub>**

G<sub>solv</sub> = -2779.096160

|    |             |             |             |
|----|-------------|-------------|-------------|
| Ni | 0.78127564  | -2.17155672 | -0.59069586 |
| C  | -0.72162682 | 1.49522166  | -1.83410936 |
| C  | 0.14182451  | 0.51865182  | -1.42885439 |
| C  | -2.25644761 | -2.18295807 | -0.47096727 |
| C  | -0.34845006 | -0.68443676 | -0.78969973 |
| C  | -1.77603282 | -0.88042639 | -0.90777145 |
| C  | -2.58541545 | 0.11301272  | -1.38597781 |

|    |             |             |             |
|----|-------------|-------------|-------------|
| C  | 1.59829817  | 0.60118312  | -1.53506383 |
| S  | 2.44944189  | -0.83078571 | -1.16315045 |
| S  | -1.05107721 | -3.36587976 | -0.21376141 |
| H  | -0.41738889 | 2.45141422  | -2.24489867 |
| H  | -3.65905316 | 0.01557036  | -1.50160340 |
| N  | 2.20981663  | 1.71200342  | -1.90294200 |
| C  | -3.36589575 | 3.09764558  | -0.67098592 |
| C  | -2.97280238 | 2.44369730  | -2.00357545 |
| H  | -2.44954112 | 3.16431559  | -2.63184968 |
| H  | -3.85393460 | 2.08833042  | -2.54078130 |
| N  | -2.07050467 | 1.30106370  | -1.79076259 |
| C  | -4.30921159 | 2.27266894  | 0.14381342  |
| N  | -3.92680020 | 1.28558794  | 1.03713700  |
| C  | -5.67368905 | 2.27084355  | 0.12228586  |
| C  | -5.01402202 | 0.70087386  | 1.52357040  |
| N  | -6.08600252 | 1.28384627  | 0.98758579  |
| H  | -6.37044464 | 2.88138247  | -0.42888946 |
| H  | -5.03140147 | -0.10854184 | 2.23611475  |
| H  | -2.46417292 | 3.33122505  | -0.09702838 |
| H  | -3.86036276 | 4.04301224  | -0.90812381 |
| H  | -7.04543009 | 1.03988350  | 1.20135211  |
| C  | -0.57702947 | 0.13352603  | 1.70638416  |
| H  | -0.21912610 | -0.38851038 | 0.59917855  |
| C  | 0.30542852  | -0.76070746 | 2.63127972  |
| O  | -0.27199014 | -1.67149599 | 3.28358683  |
| O  | 1.54305729  | -0.51134014 | 2.66291942  |
| C  | -0.07439629 | 1.56235740  | 1.55849028  |
| H  | 0.95633291  | 1.60531301  | 1.19730862  |
| H  | -0.71819808 | 2.11446402  | 0.86726079  |
| H  | -0.11566734 | 2.05835373  | 2.53505141  |
| O  | -1.87550427 | -0.02115211 | 1.82877103  |
| H  | -2.94192086 | 0.89728954  | 1.29287140  |
| N  | -3.53527422 | -2.44511209 | -0.27697372 |
| Cl | 2.15005016  | -3.92407843 | -0.23236805 |
| H  | -4.24925160 | -1.72996087 | -0.33931210 |
| H  | 1.65410037  | 2.54605607  | -2.04628123 |
| C  | 3.65613436  | 1.90367282  | -1.91376720 |
| H  | 3.83819727  | 2.81569898  | -2.48591698 |
| H  | 4.12357072  | 1.07650229  | -2.45421462 |
| C  | 4.24683979  | 2.02469985  | -0.52275636 |
| C  | 5.48591934  | 1.44534676  | -0.24325988 |
| C  | 3.58019549  | 2.72924202  | 0.48350494  |
| C  | 6.05374701  | 1.56805486  | 1.02471591  |
| H  | 6.00331045  | 0.88572209  | -1.01833963 |

|   |             |             |            |
|---|-------------|-------------|------------|
| C | 4.14106030  | 2.84324599  | 1.75422787 |
| H | 2.61465933  | 3.18524162  | 0.28137373 |
| C | 5.38050834  | 2.26408847  | 2.02831015 |
| H | 7.01586481  | 1.10876600  | 1.23089592 |
| H | 3.60886156  | 3.38460091  | 2.53069748 |
| H | 5.81642862  | 2.35152751  | 3.01881378 |
| H | -3.82860495 | -3.36493075 | 0.02735733 |

### A7

$G_{\text{solv}} = -2896.169646$

|    |             |             |             |
|----|-------------|-------------|-------------|
| Ni | 0.06765550  | -1.67902836 | -1.81256230 |
| C  | -1.12919864 | 1.92917396  | -0.18810000 |
| C  | -0.60875066 | 0.98473599  | -1.05565743 |
| C  | -0.49952022 | -2.03043429 | 1.13574145  |
| C  | -0.44324770 | -0.34969509 | -0.62593642 |
| C  | -0.73519366 | -0.64367548 | 0.72158485  |
| C  | -1.24486383 | 0.34677219  | 1.54759056  |
| C  | -0.24015360 | 1.25752393  | -2.44813127 |
| S  | 0.17034769  | -0.08646105 | -3.34273984 |
| S  | -0.05828740 | -3.06554813 | -0.09704727 |
| H  | -1.33757753 | 2.95798865  | -0.45978896 |
| H  | -1.54610809 | 0.18851564  | 2.57510827  |
| C  | -0.65756294 | 3.47092555  | 2.48522855  |
| C  | -1.86906495 | 2.66255155  | 2.01204904  |
| H  | -2.58073265 | 3.29664927  | 1.48203381  |
| H  | -2.37772657 | 2.18031424  | 2.84633649  |
| N  | -1.44741412 | 1.59184653  | 1.07767754  |
| C  | 0.40655527  | 2.64426553  | 3.13580244  |
| N  | 1.41049941  | 2.02943544  | 2.40691367  |
| C  | 0.56202069  | 2.36023362  | 4.46815968  |
| C  | 2.14974424  | 1.39249099  | 3.29569504  |
| N  | 1.68343877  | 1.57260526  | 4.55199747  |
| H  | -0.00301100 | 2.65500341  | 5.33913017  |
| H  | 3.03040922  | 0.80454270  | 3.08290783  |
| H  | -0.23479681 | 4.01364322  | 1.63320099  |
| H  | -1.03892902 | 4.21468932  | 3.19044652  |
| H  | 2.07770768  | 1.17698774  | 5.39440402  |
| Cl | 0.68919947  | -3.26787467 | -3.22966367 |
| C  | 1.00413680  | 3.76831572  | -2.18277492 |
| H  | 0.72126878  | 3.89969020  | -1.13647074 |
| H  | 1.94089890  | 3.20829450  | -2.24405444 |
| H  | 1.14233292  | 4.75810786  | -2.62667484 |
| C  | 0.48072783  | 2.73761833  | -4.78823112 |
| H  | 1.46834900  | 2.27291363  | -4.70870582 |

|   |             |             |             |
|---|-------------|-------------|-------------|
| H | -0.15032865 | 2.15977052  | -5.46773110 |
| H | 0.59378803  | 3.74349206  | -5.20376388 |
| C | 0.40091342  | -1.57311995 | 3.78738523  |
| H | 1.39078635  | -1.57093109 | 3.32506284  |
| H | 0.04027752  | -0.55043383 | 3.90631362  |
| H | 0.46812596  | -2.02313358 | 4.78211436  |
| C | 0.03063312  | -4.24910104 | 2.85891085  |
| H | -0.53100822 | -4.97598510 | 2.26781505  |
| H | 1.06546712  | -4.20083232 | 2.50627622  |
| H | 0.02424230  | -4.58474375 | 3.90029714  |
| P | -0.32689134 | 2.92964328  | -3.15607206 |
| P | -0.78883295 | -2.61193879 | 2.82916160  |

#### 4A7

$G_{\text{solv}} = -3239.222016$

|    |             |             |             |
|----|-------------|-------------|-------------|
| Ni | -0.28580579 | -1.61696101 | -2.08966142 |
| C  | -1.51433472 | 1.81348223  | -0.13902969 |
| C  | -0.90450187 | 1.01594304  | -1.06685876 |
| C  | -0.85361406 | -2.21157947 | 0.85242089  |
| C  | -0.41680352 | -0.33912299 | -0.69172217 |
| C  | -0.95928265 | -0.81498341 | 0.61169098  |
| C  | -1.56700157 | 0.06305499  | 1.47070629  |
| C  | -0.73015660 | 1.38321071  | -2.43085996 |
| S  | -0.39822565 | 0.08875841  | -3.46411926 |
| S  | -0.50679357 | -3.13251968 | -0.52350585 |
| H  | -1.87462407 | 2.81372188  | -0.35267607 |
| H  | -1.96707307 | -0.22427273 | 2.43714970  |
| C  | -1.26056429 | 3.11767970  | 2.79203434  |
| C  | -2.35727394 | 2.30233827  | 2.09837558  |
| H  | -3.03511658 | 2.97505222  | 1.57093959  |
| H  | -2.93630979 | 1.73239015  | 2.82635209  |
| N  | -1.80020362 | 1.35980245  | 1.11814205  |
| C  | -0.35393362 | 2.29576252  | 3.64697305  |
| N  | 0.80717519  | 1.70463729  | 3.18167190  |
| C  | -0.46347248 | 1.94551252  | 4.96058544  |
| C  | 1.38146488  | 1.02503742  | 4.16631107  |
| N  | 0.63158161  | 1.16476772  | 5.25724887  |
| H  | -1.21160586 | 2.19070300  | 5.69680581  |
| H  | 2.29849166  | 0.46328208  | 4.10066952  |
| H  | -0.67536061 | 3.65865124  | 2.04166548  |
| H  | -1.75707675 | 3.85944658  | 3.42260736  |
| H  | 0.84203636  | 0.74566397  | 6.15499362  |
| C  | 2.74101018  | -0.08646203 | 0.51070966  |
| C  | 2.45622060  | 1.34512800  | -0.04910830 |

|    |             |             |             |
|----|-------------|-------------|-------------|
| O  | 1.82273948  | 2.12835403  | 0.70990622  |
| O  | 2.88744857  | 1.59523805  | -1.19520372 |
| C  | 3.38286137  | -1.08599185 | -0.39781026 |
| H  | 4.39671099  | -0.74879759 | -0.64016609 |
| H  | 3.42285386  | -2.06116849 | 0.08944269  |
| H  | 2.83498877  | -1.15501561 | -1.34256257 |
| O  | 2.45405601  | -0.33534383 | 1.67010444  |
| H  | 1.19548989  | 1.76584410  | 2.20743330  |
| H  | 0.68729579  | -0.32478830 | -0.64342443 |
| C  | -0.43122644 | -4.65507777 | 2.29978739  |
| H  | 0.59733210  | -4.61501817 | 1.92853273  |
| H  | -0.43279582 | -5.11327792 | 3.29382888  |
| H  | -1.03519216 | -5.28118954 | 1.63893769  |
| C  | 0.09734237  | -2.15871674 | 3.53749347  |
| H  | 1.09344360  | -2.21168725 | 3.09049236  |
| H  | -0.18058134 | -1.11694165 | 3.70758953  |
| H  | 0.10734278  | -2.66858901 | 4.50560995  |
| C  | 0.33626840  | 4.00611385  | -2.07623744 |
| H  | 0.39204712  | 5.01989048  | -2.48494061 |
| H  | 0.05593482  | 4.07861439  | -1.02301136 |
| H  | 1.31551091  | 3.52822307  | -2.16252325 |
| C  | -0.16696861 | 3.04730797  | -4.69800504 |
| H  | 0.84965498  | 2.64390376  | -4.66448841 |
| H  | -0.77038734 | 2.46154833  | -5.39543093 |
| H  | -0.13065648 | 4.07730525  | -5.06625354 |
| Cl | 0.29641436  | -3.11600328 | -3.70990130 |
| P  | -0.95283602 | 3.09818246  | -3.03904545 |
| P  | -1.17506757 | -2.98542312 | 2.48442118  |

**TS<sub>4A7,5A7</sub>**

G<sub>solv</sub> = -3239.173311

|    |             |             |             |
|----|-------------|-------------|-------------|
| Ni | -0.15747278 | 1.67489454  | 1.99973340  |
| C  | -1.44684964 | -1.82000240 | 0.18313277  |
| C  | -0.93981750 | -0.94348356 | 1.11190247  |
| C  | -0.79121005 | 2.19319743  | -0.92817974 |
| C  | -0.59477588 | 0.39905683  | 0.71580413  |
| C  | -0.99602655 | 0.79614620  | -0.60484707 |
| C  | -1.51579722 | -0.13801634 | -1.47410088 |
| C  | -0.71839153 | -1.26427568 | 2.50795829  |
| S  | -0.29231761 | 0.03968318  | 3.46983175  |
| S  | -0.29781865 | 3.14378502  | 0.36356935  |
| H  | -1.71361623 | -2.84677139 | 0.40152905  |
| H  | -1.83365395 | 0.08838940  | -2.48451796 |
| C  | -0.83254629 | -3.13610611 | -2.66285751 |

|    |             |             |             |
|----|-------------|-------------|-------------|
| C  | -2.07247774 | -2.44300565 | -2.08815326 |
| H  | -2.70532292 | -3.17410532 | -1.58480676 |
| H  | -2.65779822 | -1.95596909 | -2.86876202 |
| N  | -1.70229352 | -1.41996594 | -1.08935815 |
| C  | -0.05907846 | -2.32765058 | -3.65341330 |
| N  | 0.87113663  | -1.34931390 | -3.34226102 |
| C  | -0.10273986 | -2.40417525 | -5.01533142 |
| C  | 1.35965457  | -0.84874617 | -4.46922175 |
| N  | 0.78980631  | -1.47505045 | -5.49816991 |
| H  | -0.67921082 | -3.04126881 | -5.66644506 |
| H  | 2.09908488  | -0.06771661 | -4.54569109 |
| H  | -0.18167710 | -3.46258767 | -1.84581785 |
| H  | -1.18364647 | -4.03422292 | -3.17721077 |
| H  | 0.99510993  | -1.29271320 | -6.47289809 |
| C  | 1.96477460  | 0.02488326  | -0.16273509 |
| C  | 2.18945374  | -1.43259411 | 0.33878944  |
| O  | 1.87659130  | -2.37148357 | -0.44100553 |
| O  | 2.65010763  | -1.57509013 | 1.50596064  |
| C  | 2.96212971  | 1.03590283  | 0.40460123  |
| H  | 3.97059187  | 0.79381944  | 0.04865697  |
| H  | 2.70014677  | 2.03716404  | 0.05132026  |
| H  | 2.96809515  | 1.03944627  | 1.49683918  |
| O  | 1.71768048  | 0.16378858  | -1.45603074 |
| H  | 1.16018266  | -0.90756885 | -2.39186304 |
| H  | 0.94702955  | 0.26225962  | 0.46806559  |
| C  | -0.35443147 | 4.55389690  | -2.48810657 |
| H  | 0.71079714  | 4.43235925  | -2.26942712 |
| H  | -0.46735008 | 4.99644439  | -3.48244133 |
| H  | -0.80619906 | 5.23427978  | -1.76294216 |
| C  | -0.23121535 | 2.01730384  | -3.75799714 |
| H  | 0.79963991  | 1.89441070  | -3.41935594 |
| H  | -0.67318881 | 1.04673887  | -3.98837460 |
| H  | -0.24132083 | 2.61333995  | -4.67561909 |
| C  | 0.20234195  | -3.97126927 | 2.36131905  |
| H  | 0.15154790  | -4.95642693 | 2.83448939  |
| H  | -0.01474641 | -4.09228633 | 1.29867075  |
| H  | 1.20598650  | -3.55804063 | 2.48669899  |
| C  | -0.34053287 | -2.81019443 | 4.89222160  |
| H  | 0.69966514  | -2.47052713 | 4.88095640  |
| H  | -0.93809400 | -2.15463646 | 5.52997361  |
| H  | -0.37956335 | -3.81904884 | 5.31459711  |
| Cl | 0.50710680  | 3.18645126  | 3.50828387  |
| P  | -1.05608644 | -2.91649075 | 3.20756337  |
| P  | -1.24139710 | 2.94851845  | -2.52562909 |



## References

- 1 M. J. Frisch, G. W. Trucks, H. B. Schlegel, G. E. Scuseria, M. A. Robb, J. R. Cheeseman, G. Scalmani, V. Barone, B. Mennucci, G. A. Petersson, H. Nakatsuji, M. Caricato, X. Li, H. P. Hratchian, A. F. Izmaylov, J. Bloino, G. Zheng, J. L. Sonnenberg, M. Hada, M. Ehara, K. Toyota, R. Fukuda, J. Hasegawa, M. Ishida, T. Nakajima, Y. Honda, O. Kitao, H. Nakai, T. Vreven, J. A. Montgomery Jr., J. E. Peralta, F. Ogliaro, M. J. Bearpark, J. Heyd, E. N. Brothers, K. N. Kudin, V. N. Staroverov, R. Kobayashi, J. Normand, K. Raghavachari, A. P. Rendell, J. C. Burant, S. S. Iyengar, J. Tomasi, M. Cossi, N. Rega, N. J. Millam, M. Klene, J. E. Knox, J. B. Cross, V. Bakken, C. Adamo, J. Jaramillo, R. Gomperts, R. E. Stratmann, O. Yazyev, A. J. Austin, R. Cammi, C. Pomelli, J. W. Ochterski, R. L. Martin, K. Morokuma, V. G. Zakrzewski, G. A. Voth, P. Salvador, J. J. Dannenberg, S. Dapprich, A. D. Daniels, Ö. Farkas, J. B. Foresman, J. V. Ortiz, J. Cioslowski and D. J. Fox, *Gaussian 09, revision C.01*, Gaussian, Inc., Wallingford, CT, USA, 2009.
- 2 J.-D. Chai, M. Head-Gordon, *Phys. Chem. Chem. Phys.*, 2008, 10, 6615-6620.
- 3 a) W. J. Hehre, R. Ditchfield and J. A. Pople, *J. Chem. Phys.*, 1972, 56, 2257-2261; b) P. C. Hariharan and J. A. Pople, *Theor. Chim. Acta.*, 1973, 28, 213-222; c) M. M. Francl, W. J. Pietro, W. J. Hehre, J. S. Binkley, M. S. Gordon, D. J. DeFrees and J. A. Pople, *J. Chem. Phys.*, 1982, 77, 3654-3665.
- 4 J. M. Martin and A. Sundermann, *J. Chem. Phys.*, 2001, 114, 3408-3420.
- 5 J. Tomasi, B. Mennucci and R. Cammi, *Chem. Rev.*, 2005, 105, 2999-3094.
- 6 A. V. Marenich, C. J. Cramer and D. G. Truhlar, *J. Phys. Chem. B*, 2009, 113, 6378-6396.
- 7 J. Manson, C. E. Webster and M. B. Hall, *Texas A&M University: College Station, TX: 2006; JIMP2, version 0.091*.
- 8 J. Tao, J. P. Perdew, V. N. Staroverov and G. E. Scuseria, *Phys. Rev. Lett.*, 2003, 91, 146401-146401.
- 9 A. D. Becke, *J. Chem. Phys.*, 1993, 98, 5648-5652.
- 10 C. Lee, W. Yang and R. G. Parr, *Phys. Rev. B.*, 1988, 37, 785-789.
- 11 L. Goerigk and S. Grimme, *Phys. Chem. Chem. Phys.*, 2011, 13, 6670-6688.
- 12 Y. Zhao and D. G. Truhlar, *Theor. Chem. Acc.*, 2008, 120, 215-241.
